# Supplementary material for: Diagnostic Substitution for Intellectual Disability: A Flawed Explanation for the Rise in Autism
Source: Springer Nature journal article supplement (doi:10.1007/s10803-017-3187-0), 2017-06-06

**Diagnostic substitution for intellectual disability: A flawed explanation for the rise of autism**

Supplementary Figure S4: Time trends in Autism Spectrum Disorder (ASD, red triangles), Intellectual Disability (ID, black circles) and Other Health Impairment (OHI, blue stars), using constant-age tracking of 8 year-olds over IDEA report years 1991-2011. Results are plotted for the Group B states, as discussed in the text, i.e., the states in which decrease in ID is substantially greater than the increase in ASD over report years 2000-2011.


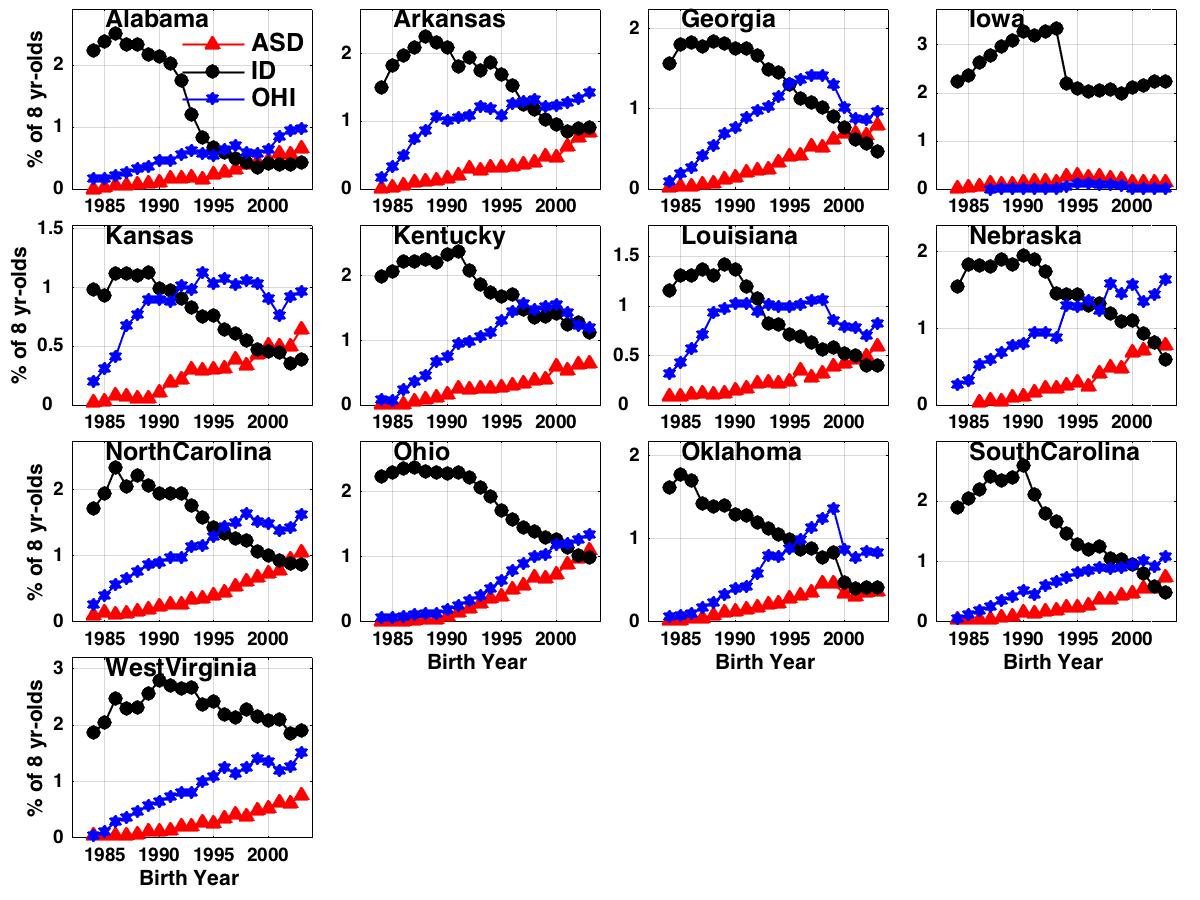

Supplement: MOESM4 [file 12340648]
