# Supplementary material for: Diagnostic Substitution for Intellectual Disability: A Flawed Explanation for the Rise in Autism
Source: Springer Nature journal article supplement (doi:10.1007/s10803-017-3187-0), 2017-06-06
Supplement: MOESM8 [file 12340648]

## Sheet: Age5
ST	State\Report Year	1991	1992	1993	1994	1995	1996	1997	1998	1999	2000	2001	2002	2003	2004	2005	2006	2007	2008	2009	2010	2011
AL	Alabama	NaN	NaN	NaN	NaN	NaN	NaN	NaN	NaN	NaN	33	19	7	13	8	NaN	NaN	NaN	NaN	NaN	NaN	NaN
AK	Alaska	NaN	NaN	NaN	NaN	NaN	NaN	NaN	NaN	NaN	1	2	NaN	2	NaN	NaN	NaN	NaN	NaN	6	5	NaN
AZ	Arizona	NaN	NaN	NaN	NaN	NaN	NaN	NaN	NaN	NaN	234	198	246	275	307	340	324	303	NaN	347	253	233
AR	Arkansas	NaN	NaN	NaN	NaN	NaN	NaN	NaN	NaN	NaN	161	151	147	161	136	138	135	123	103	108	98	95
CA	California	NaN	NaN	NaN	NaN	NaN	NaN	NaN	NaN	NaN	1615	1676	1701	1637	1681	1696	1643	1540	1629	1520	1633	1688
CO	Colorado	NaN	NaN	NaN	NaN	NaN	NaN	NaN	NaN	NaN	23	30	39	34	41	36	33	47	41	NaN	37	NaN
CT	Connecticut	NaN	NaN	NaN	NaN	NaN	NaN	NaN	NaN	NaN	31	34	18	23	30	22	20	32	23	26	21	23
DE	Delaware	NaN	NaN	NaN	NaN	NaN	NaN	NaN	NaN	NaN	56	67	90	93	83	96	98	91	68	56	25	13
DC	District of Columbia	NaN	NaN	NaN	NaN	NaN	NaN	NaN	NaN	NaN	13	12	19	6	NaN	NaN	14	NaN	6	NaN	NaN	NaN
FL	Florida	NaN	NaN	NaN	NaN	NaN	NaN	NaN	NaN	NaN	764	682	680	725	674	602	565	554	482	411	457	449
GA	Georgia	NaN	NaN	NaN	NaN	NaN	NaN	NaN	NaN	NaN	781	722	609	501	412	404	309	188	129	152	119	119
HI	Hawaii	NaN	NaN	NaN	NaN	NaN	NaN	NaN	NaN	NaN	23	10	7	8	14	12	11	6	7	8	9	8
ID	Idaho	NaN	NaN	NaN	NaN	NaN	NaN	NaN	NaN	NaN	11	6	8	6	14	16	6	11	17	10	NaN	NaN
IL	Illinois	NaN	NaN	NaN	NaN	NaN	NaN	NaN	NaN	NaN	574	591	357	378	331	320	263	227	217	154	143	135
IN	Indiana	NaN	NaN	NaN	NaN	NaN	NaN	NaN	NaN	NaN	675	645	544	596	594	572	620	513	531	503	465	428
IA	Iowa	NaN	NaN	NaN	NaN	NaN	NaN	NaN	NaN	NaN	155	563	364	372	376	381	410	383	435	455	538	562
KS	Kansas	NaN	NaN	NaN	NaN	NaN	NaN	NaN	NaN	NaN	44	36	33	42	41	41	43	28	34	26	24	32
KY	Kentucky	NaN	NaN	NaN	NaN	NaN	NaN	NaN	NaN	NaN	43	53	49	60	49	52	75	80	57	63	50	75
LA	Louisiana	NaN	NaN	NaN	NaN	NaN	NaN	NaN	NaN	NaN	21	31	65	111	115	69	81	52	43	43	31	39
ME	Maine	NaN	NaN	NaN	NaN	NaN	NaN	NaN	NaN	NaN	14	13	14	9	NaN	15	20	12	7	7	10	NaN
MD	Maryland	NaN	NaN	NaN	NaN	NaN	NaN	NaN	NaN	NaN	117	88	96	86	78	55	50	37	44	52	54	44
MA	Massachusetts	NaN	NaN	NaN	NaN	NaN	NaN	NaN	NaN	NaN	405	51	47	30	25	35	30	29	34	19	28	28
MI	Michigan	NaN	NaN	NaN	NaN	NaN	NaN	NaN	NaN	NaN	417	429	406	379	351	345	324	296	268	280	242	258
MN	Minnesota	NaN	NaN	NaN	NaN	NaN	NaN	NaN	NaN	NaN	123	110	138	126	83	113	106	104	117	94	92	84
MS	Mississippi	NaN	NaN	NaN	NaN	NaN	NaN	NaN	NaN	NaN	NaN	1	1	3	NaN	NaN	NaN	NaN	NaN	5	NaN	NaN
MO	Missouri	NaN	NaN	NaN	NaN	NaN	NaN	NaN	NaN	NaN	175	187	180	177	181	196	164	164	171	165	150	167
MT	Montana	NaN	NaN	NaN	NaN	NaN	NaN	NaN	NaN	NaN	20	11	7	11	10	7	NaN	6	9	NaN	17	NaN
NE	Nebraska	NaN	NaN	NaN	NaN	NaN	NaN	NaN	NaN	NaN	129	83	117	79	82	87	91	77	66	57	50	30
NV	Nevada	NaN	NaN	NaN	NaN	NaN	NaN	NaN	NaN	NaN	23	30	19	32	32	42	42	43	39	38	31	43
NH	New Hampshire	NaN	NaN	NaN	NaN	NaN	NaN	NaN	NaN	NaN	1	2	2	2	NaN	NaN	NaN	NaN	NaN	NaN	NaN	NaN
NJ	New Jersey	NaN	NaN	NaN	NaN	NaN	NaN	NaN	NaN	NaN	128	108	129	114	112	115	161	124	148	141	141	158
NM	New Mexico	NaN	NaN	NaN	NaN	NaN	NaN	NaN	NaN	NaN	9	14	13	8	17	12	18	16	18	17	9	5
NY	New York	NaN	NaN	NaN	NaN	NaN	NaN	NaN	NaN	NaN	149	238	NaN	NaN	NaN	NaN	326	314	248	277	224	257
NC	North Carolina	NaN	NaN	NaN	NaN	NaN	NaN	NaN	NaN	NaN	205	73	50	35	27	30	33	25	8	16	26	17
ND	North Dakota	NaN	NaN	NaN	NaN	NaN	NaN	NaN	NaN	NaN	9	6	7	9	8	NaN	NaN	NaN	NaN	NaN	NaN	NaN
OH	Ohio	NaN	NaN	NaN	NaN	NaN	NaN	NaN	NaN	NaN	3461	3419	3510	3551	3639	4099	4134	NaN	298	285	185	225
OK	Oklahoma	NaN	NaN	NaN	NaN	NaN	NaN	NaN	NaN	NaN	4	31	33	36	32	32	47	38	46	54	92	93
OR	Oregon	NaN	NaN	NaN	NaN	NaN	NaN	NaN	NaN	NaN	72	63	75	61	NaN	69	71	80	56	54	44	NaN
PA	Pennsylvania	NaN	NaN	NaN	NaN	NaN	NaN	NaN	NaN	NaN	270	304	280	295	365	320	374	328	339	302	283	300
RI	Rhode Island	NaN	NaN	NaN	NaN	NaN	NaN	NaN	NaN	NaN	10	16	8	11	NaN	NaN	11	8	6	7	NaN	NaN
SC	South Carolina	NaN	NaN	NaN	NaN	NaN	NaN	NaN	NaN	NaN	209	198	194	170	159	167	123	NaN	45	38	42	54
SD	South Dakota	NaN	NaN	NaN	NaN	NaN	NaN	NaN	NaN	NaN	21	15	13	15	21	18	12	18	17	24	31	39
TN	Tennessee	NaN	NaN	NaN	NaN	NaN	NaN	NaN	NaN	NaN	62	48	38	37	42	48	37	32	38	46	44	58
TX	Texas	NaN	NaN	NaN	NaN	NaN	NaN	NaN	NaN	NaN	422	457	440	483	549	598	638	551	541	582	542	563
UT	Utah	NaN	NaN	NaN	NaN	NaN	NaN	NaN	NaN	NaN	43	41	28	35	33	26	27	27	27	32	33	20
VT	Vermont	NaN	NaN	NaN	NaN	NaN	NaN	NaN	NaN	NaN	2	7	4	2	NaN	NaN	NaN	NaN	NaN	NaN	NaN	NaN
VA	Virginia	NaN	NaN	NaN	NaN	NaN	NaN	NaN	NaN	NaN	139	149	148	156	140	153	113	141	163	147	139	125
WA	Washington	NaN	NaN	NaN	NaN	NaN	NaN	NaN	NaN	NaN	5	5	6	6	NaN	NaN	NaN	11	8	NaN	12	6
WV	West Virginia	NaN	NaN	NaN	NaN	NaN	NaN	NaN	NaN	NaN	68	48	56	70	NaN	63	64	73	73	NaN	NaN	74
WI	Wisconsin	NaN	NaN	NaN	NaN	NaN	NaN	NaN	NaN	NaN	222	175	171	184	170	143	151	145	129	106	137	119
WY	Wyoming	NaN	NaN	NaN	NaN	NaN	NaN	NaN	NaN	NaN	10	9	11	9	15	14	13	7	10	7	NaN	5

## Sheet: Age6
ST	State\Report Year	1991	1992	1993	1994	1995	1996	1997	1998	1999	2000	2001	2002	2003	2004	2005	2006	2007	2008	2009	2010	2011
AL	Alabama	491	546	536	512	479	477	387	250	250	185	92	85	56	54	49	42	30	29	45	47	29
AK	Alaska	22	34	33	38	42	43	33	30	34	28	34	19	7	NaN	7	NaN	9	NaN	15	NaN	8
AZ	Arizona	251	265	318	329	361	353	368	403	374	410	384	340	438	456	478	506	491	476	473	417	337
AR	Arkansas	233	255	277	323	356	408	321	347	327	321	298	306	292	273	241	238	201	212	184	217	193
CA	California	1535	1616	1560	1659	1764	1859	1870	2018	1956	1967	1961	1908	1980	1947	1877	1967	1833	1799	1938	1857	1978
CO	Colorado	71	82	79	109	126	144	122	136	158	146	129	134	118	130	125	127	106	132	113	102	112
CT	Connecticut	105	135	332	157	146	169	176	147	123	100	129	97	93	70	88	81	74	87	86	83	67
DE	Delaware	56	61	73	143	97	103	115	95	86	80	74	90	108	110	88	109	101	98	83	62	51
DC	District of Columbia	1	3	2	28	23	21	40	38	33	33	24	30	23	29	11	24	NaN	7	9	8	6
FL	Florida	1289	1148	1192	1540	1680	1880	1593	1697	1520	1414	1421	1292	1326	1343	1276	1267	1095	1040	904	886	969
GA	Georgia	923	969	1066	1219	1211	1230	1276	1309	1212	1284	1144	984	843	785	683	650	476	340	280	226	224
HI	Hawaii	76	99	77	108	111	102	108	130	125	80	34	32	21	17	23	25	34	19	16	28	25
ID	Idaho	122	114	146	117	128	123	83	24	31	26	23	19	18	27	33	39	39	37	32	22	31
IL	Illinois	460	433	492	1189	1209	1234	1269	1175	1184	1158	1193	926	992	954	956	901	779	543	477	361	363
IN	Indiana	569	615	736	899	977	982	1022	989	1070	937	856	869	814	889	927	848	871	740	783	686	673
IA	Iowa	573	627	633	624	634	680	623	634	648	680	687	423	454	464	453	463	490	528	533	614	640
KS	Kansas	188	207	199	196	233	239	201	182	169	169	171	138	125	132	111	107	86	61	83	72	76
KY	Kentucky	437	468	586	524	495	574	548	466	281	195	193	241	204	219	217	223	229	218	186	218	158
LA	Louisiana	398	379	457	452	498	505	447	422	255	243	167	149	151	162	121	116	113	76	79	72	66
ME	Maine	44	39	37	37	37	42	34	17	25	11	19	22	22	15	20	22	35	18	19	16	19
MD	Maryland	278	301	299	284	283	277	276	270	278	229	194	194	200	169	175	131	126	134	117	132	118
MA	Massachusetts	1514	549	552	630	626	606	608	628	553	509	116	102	90	72	61	53	52	81	45	44	58
MI	Michigan	572	667	712	838	975	934	948	945	924	836	854	853	782	765	705	627	578	549	490	475	467
MN	Minnesota	533	515	464	523	575	501	524	492	353	364	342	336	314	237	236	253	255	242	245	229	247
MS	Mississippi	125	56	51	41	46	35	25	30	21	34	36	28	26	18	19	26	14	18	17	15	NaN
MO	Missouri	456	406	508	536	534	624	583	549	501	425	399	436	431	412	462	417	390	346	402	414	408
MT	Montana	61	66	56	58	66	70	51	62	58	67	48	38	48	54	53	54	54	54	62	54	30
NE	Nebraska	239	233	233	243	225	251	272	238	223	207	158	145	156	132	129	129	143	112	99	78	77
NV	Nevada	67	80	77	85	94	78	72	77	88	85	75	101	96	106	88	99	99	96	97	114	95
NH	New Hampshire	23	13	18	25	26	25	24	13	21	6	4	7	4	NaN	5	NaN	NaN	NaN	NaN	NaN	NaN
NJ	New Jersey	133	112	173	196	176	181	171	160	196	205	216	183	187	191	160	180	241	185	202	208	188
NM	New Mexico	78	94	64	70	75	87	80	76	67	29	24	23	32	20	30	25	30	35	34	51	43
NY	New York	723	702	781	678	668	667	652	636	612	581	545	514	479	459	419	399	402	368	318	369	282
NC	North Carolina	806	1034	972	1228	1248	1337	1216	1180	1139	1080	489	387	312	231	211	216	185	177	133	124	135
ND	North Dakota	33	37	34	43	44	28	42	28	32	27	31	22	25	21	18	15	13	8	10	15	14
OH	Ohio	1078	1303	1210	1243	1327	1258	1236	1296	1287	1179	1127	1166	965	998	947	951	928	775	787	732	661
OK	Oklahoma	332	348	372	345	342	348	349	352	311	296	233	75	91	70	74	71	78	71	106	90	129
OR	Oregon	48	60	52	137	124	126	126	123	134	113	125	135	132	128	113	123	117	110	102	102	83
PA	Pennsylvania	865	816	780	1036	994	922	951	918	901	793	748	719	721	682	758	691	665	640	653	612	558
RI	Rhode Island	54	48	59	50	44	49	48	41	51	41	37	40	30	36	27	37	38	15	8	9	9
SC	South Carolina	518	570	641	692	688	694	710	585	555	500	518	435	463	436	474	445	345	214	144	151	139
SD	South Dakota	64	63	64	75	75	67	68	68	65	57	54	53	47	32	47	45	53	66	75	86	86
TN	Tennessee	354	355	335	377	375	322	357	246	205	133	115	130	109	96	91	102	89	70	86	103	103
TX	Texas	1023	1049	1051	1069	957	1019	940	950	942	997	949	963	995	1077	1138	1205	1239	1223	1242	1318	1248
UT	Utah	162	195	221	212	165	179	161	157	133	115	104	95	93	81	67	64	64	59	75	82	57
VT	Vermont	34	32	27	64	57	60	20	24	28	11	14	13	11	11	6	11	NaN	NaN	NaN	9	9
VA	Virginia	440	412	400	449	443	443	365	326	296	298	259	253	230	210	208	210	212	247	257	333	262
WA	Washington	497	374	457	486	428	345	363	286	238	64	59	46	48	37	62	25	43	40	30	38	33
WV	West Virginia	247	257	225	210	228	231	279	256	286	248	242	220	199	230	242	245	228	227	250	227	225
WI	Wisconsin	77	95	99	634	640	661	597	582	518	499	500	396	404	431	382	416	380	397	350	322	331
WY	Wyoming	25	32	26	39	29	36	29	23	16	24	26	21	19	16	23	30	27	15	16	NaN	23

## Sheet: Age7
ST	State\Report Year	1991	1992	1993	1994	1995	1996	1997	1998	1999	2000	2001	2002	2003	2004	2005	2006	2007	2008	2009	2010	2011
AL	Alabama	889	981	981	959	973	866	886	824	739	622	314	223	195	168	134	101	102	98	107	105	108
AK	Alaska	18	35	40	48	43	57	60	42	55	44	41	39	23	NaN	17	NaN	12	NaN	6	19	9
AZ	Arizona	333	327	395	422	410	423	426	458	469	432	494	462	436	523	511	555	550	516	525	478	446
AR	Arkansas	374	396	463	502	540	557	598	467	506	452	497	440	449	388	357	301	296	267	263	254	279
CA	California	1669	1709	1738	1812	1972	2054	2106	2165	2289	2264	2214	2240	2127	2143	2121	2039	2037	1953	1922	2086	2018
CO	Colorado	84	103	121	131	138	171	183	156	178	179	209	160	160	163	157	170	152	117	143	141	142
CT	Connecticut	159	175	268	211	197	224	223	205	163	152	145	156	122	121	88	94	93	89	91	81	90
DE	Delaware	61	81	80	137	153	111	131	141	130	121	112	96	100	119	112	91	105	95	100	94	69
DC	District of Columbia	2	1	5	52	34	49	53	44	48	47	77	50	43	54	33	46	NaN	14	24	22	15
FL	Florida	1580	1565	1773	1968	2109	2225	2286	2009	2004	1867	1839	1765	1610	1618	1614	1556	1445	1250	1204	1092	1059
GA	Georgia	1207	1371	1456	1459	1643	1706	1658	1651	1662	1538	1501	1342	1144	1080	1032	928	854	618	511	372	337
HI	Hawaii	79	83	112	108	145	142	143	160	154	138	83	39	37	24	27	34	30	38	31	24	31
ID	Idaho	181	180	184	189	160	161	159	102	45	49	38	44	44	38	52	48	63	62	53	59	45
IL	Illinois	675	722	818	1458	1567	1573	1537	1594	1446	1497	1542	1363	1204	1191	1198	1193	1081	908	682	647	502
IN	Indiana	803	890	924	1258	1209	1292	1279	1337	1271	1345	1177	1129	1104	1060	1077	1094	961	984	855	887	822
IA	Iowa	703	723	762	773	824	840	941	884	910	874	923	557	539	568	571	573	581	634	622	674	685
KS	Kansas	291	289	304	325	315	338	307	317	250	260	214	218	179	157	152	139	137	124	87	104	89
KY	Kentucky	742	808	925	921	902	792	859	865	784	557	462	456	480	421	398	405	432	397	370	329	335
LA	Louisiana	505	547	614	630	616	642	643	610	499	338	319	241	213	224	162	173	159	160	113	112	106
ME	Maine	75	71	56	52	72	43	53	43	29	34	29	27	33	30	30	30	31	37	23	26	20
MD	Maryland	334	381	386	349	400	380	324	337	383	316	301	250	224	266	224	213	178	210	175	166	179
MA	Massachusetts	2013	755	750	812	815	815	817	798	740	683	245	228	171	162	183	109	112	112	110	85	94
MI	Michigan	807	840	928	1234	1151	1278	1305	1325	1344	1274	1178	1128	1182	1065	1009	931	890	813	733	680	686
MN	Minnesota	648	683	646	600	671	647	623	640	597	554	574	525	542	509	501	472	492	482	454	429	437
MS	Mississippi	181	241	155	164	158	151	130	120	107	91	109	107	91	86	74	68	86	61	64	43	NaN
MO	Missouri	588	581	586	729	721	715	771	722	685	625	518	524	603	557	570	566	562	527	479	510	512
MT	Montana	70	92	96	68	64	94	79	77	74	80	77	62	52	57	59	65	55	56	65	75	36
NE	Nebraska	287	337	325	329	340	333	368	323	325	273	249	236	193	221	160	183	174	180	141	117	106
NV	Nevada	95	90	116	102	114	109	102	93	89	118	103	96	121	111	121	113	105	108	117	109	123
NH	New Hampshire	36	44	27	42	41	42	32	33	18	30	8	7	17	NaN	8	NaN	NaN	NaN	NaN	NaN	NaN
NJ	New Jersey	149	174	196	202	225	205	223	203	230	269	294	257	243	227	225	205	255	325	204	231	224
NM	New Mexico	99	92	110	92	100	95	118	97	100	72	51	42	37	54	43	44	40	56	50	54	46
NY	New York	608	590	657	569	561	560	547	534	514	488	458	432	403	386	352	335	476	466	433	372	417
NC	North Carolina	1158	1312	1626	1528	1794	1749	1736	1729	1686	1680	1369	868	756	609	574	507	472	404	405	340	318
ND	North Dakota	39	53	64	68	77	57	51	70	52	50	41	40	32	37	27	28	20	21	9	14	18
OH	Ohio	1949	2319	2383	2347	2331	2319	2230	2225	2238	2185	1905	1858	1624	1487	1520	1371	1337	1261	1113	1066	1001
OK	Oklahoma	558	547	655	540	485	535	509	481	482	429	299	238	124	120	114	177	124	117	109	133	145
OR	Oregon	82	97	112	184	214	169	204	165	164	175	155	172	172	176	158	153	160	157	146	129	122
PA	Pennsylvania	1256	1228	1183	1501	1436	1486	1434	1425	1410	1297	1231	1122	1048	957	977	1001	891	884	863	789	743
RI	Rhode Island	56	70	66	66	66	60	62	61	52	64	62	50	53	39	54	53	48	45	19	12	15
SC	South Carolina	728	818	940	1010	1002	1044	1068	966	842	729	695	619	526	574	536	493	501	370	254	200	215
SD	South Dakota	98	77	77	97	98	86	86	84	84	87	72	61	51	53	41	56	65	60	73	89	93
TN	Tennessee	551	566	610	634	683	663	635	546	374	309	282	241	258	230	189	172	153	151	124	140	150
TX	Texas	1363	1359	1387	1387	1341	1328	1350	1203	1291	1204	1306	1215	1265	1237	1367	1436	1437	1540	1586	1616	1727
UT	Utah	197	233	235	247	234	203	204	189	185	156	154	148	136	124	114	105	111	106	106	120	117
VT	Vermont	46	56	63	72	75	81	65	65	65	60	30	32	34	22	25	16	NaN	NaN	NaN	16	15
VA	Virginia	618	636	616	632	655	651	563	480	436	395	375	358	308	264	291	271	281	313	323	450	463
WA	Washington	512	507	547	608	646	551	459	447	421	302	106	99	87	84	96	95	65	81	72	57	83
WV	West Virginia	306	333	373	380	354	394	447	430	431	437	383	395	348	324	351	340	344	348	313	307	306
WI	Wisconsin	120	140	150	829	841	810	839	769	790	675	606	593	483	490	520	475	448	426	469	399	380
WY	Wyoming	34	36	38	36	43	38	43	32	32	20	35	28	30	21	24	19	31	27	18	NaN	25

## Sheet: Age8
ST	State\Report Year	1991	1992	1993	1994	1995	1996	1997	1998	1999	2000	2001	2002	2003	2004	2005	2006	2007	2008	2009	2010	2011
AL	Alabama	1263	1328	1398	1435	1351	1341	1285	1295	1217	1040	707	477	377	323	281	249	204	241	238	226	235
AK	Alaska	22	30	40	49	60	52	60	63	50	57	49	49	40	33	23	23	21	20	18	NaN	33
AZ	Arizona	371	382	415	463	506	456	489	503	518	535	491	504	534	497	546	548	555	544	512	494	469
AR	Arkansas	496	512	630	663	701	769	757	751	646	683	593	631	570	526	446	422	372	348	317	327	333
CA	California	1790	1889	1835	1929	2032	2177	2293	2319	2407	2501	2456	2430	2419	2253	2250	2200	2131	2121	2062	2026	2189
CO	Colorado	122	125	142	183	172	174	178	219	190	202	208	220	161	190	188	177	172	185	114	170	156
CT	Connecticut	196	198	265	269	240	256	263	248	240	183	184	180	167	147	132	98	110	111	102	102	91
DE	Delaware	74	79	72	132	136	157	134	154	160	153	146	132	103	118	132	122	92	112	94	105	108
DC	District of Columbia	2	1	2	87	56	54	64	64	79	71	90	97	53	63	61	61	33	42	21	38	26
FL	Florida	1957	1744	2122	2463	2455	2652	2708	2679	2441	2367	2230	2184	2029	1909	1842	1800	1711	1576	1360	1344	1258
GA	Georgia	1541	1547	1798	1855	1848	1974	2025	2020	2028	1920	1745	1679	1515	1328	1314	1291	1161	1010	813	733	606
HI	Hawaii	95	101	97	150	143	181	196	182	177	159	135	84	62	55	47	59	51	49	61	55	53
ID	Idaho	198	210	210	211	228	186	171	166	123	79	75	60	64	62	66	81	75	84	82	84	101
IL	Illinois	760	864	1015	1662	1701	1801	1819	1766	1809	1756	1809	1652	1573	1402	1311	1372	1252	1165	1052	840	836
IN	Indiana	994	1089	1222	1441	1566	1564	1574	1580	1621	1501	1628	1413	1366	1325	1242	1251	1228	1120	1078	954	960
IA	Iowa	743	817	872	955	970	1035	1100	1193	1159	1175	1178	743	697	683	696	717	691	746	753	782	788
KS	Kansas	347	347	340	402	392	386	394	352	341	315	282	254	255	213	200	188	164	162	160	127	140
KY	Kentucky	1039	980	1184	1237	1252	1228	1094	1175	1170	1075	879	815	786	813	712	687	710	734	664	658	575
LA	Louisiana	646	703	809	808	812	764	819	803	705	632	472	462	397	372	307	284	301	282	270	216	213
ME	Maine	85	85	84	80	66	89	60	66	56	35	43	29	37	45	34	44	30	34	40	25	40
MD	Maryland	361	378	429	403	461	454	451	389	438	420	371	373	319	272	298	265	227	240	245	228	222
MA	Massachusetts	2387	872	877	948	958	940	977	977	894	845	384	358	343	301	334	299	211	238	184	187	179
MI	Michigan	881	1044	1148	1412	1477	1403	1568	1686	1632	1650	1588	1427	1481	1410	1345	1278	1190	1155	1069	1021	948
MN	Minnesota	737	717	771	706	652	718	716	660	681	692	595	593	577	556	511	532	491	519	512	483	445
MS	Mississippi	345	346	387	305	345	342	294	270	268	226	203	239	220	180	175	175	171	200	132	118	96
MO	Missouri	685	697	735	807	879	877	898	931	824	813	718	638	616	687	658	639	654	632	606	546	573
MT	Montana	74	75	98	96	80	84	89	89	90	76	78	84	67	65	58	75	76	66	64	72	34
NE	Nebraska	378	345	405	396	384	402	392	429	406	365	302	294	292	264	268	246	229	236	205	183	134
NV	Nevada	93	104	104	130	92	134	115	117	117	108	127	122	119	139	123	112	117	107	113	123	120
NH	New Hampshire	42	45	52	47	52	50	50	43	47	30	39	15	20	26	22	NaN	NaN	20	11	NaN	11
NJ	New Jersey	220	182	245	243	226	268	235	251	297	332	368	336	322	288	268	278	259	372	271	245	275
NM	New Mexico	107	132	115	120	110	130	119	133	110	108	93	61	68	60	79	57	62	73	86	74	76
NY	New York	935	908	1011	890	876	876	856	835	804	762	715	675	629	603	550	523	532	546	550	529	470
NC	North Carolina	1382	1513	1759	2106	1899	2172	2117	2032	2059	2056	1856	1683	1484	1384	1348	1375	1259	1198	1112	1030	1003
ND	North Dakota	53	50	79	82	78	89	70	65	93	70	60	47	47	35	37	32	36	34	23	20	25
OH	Ohio	2779	3058	3237	3346	3286	3236	3257	3275	3286	3140	2911	2634	2304	2069	1911	1856	1714	1693	1536	1332	1280
OK	Oklahoma	816	783	847	803	662	647	656	610	602	561	509	473	438	384	397	364	397	227	195	199	204
OR	Oregon	97	113	132	254	265	220	231	266	240	227	218	220	218	201	203	202	207	202	200	181	156
PA	Pennsylvania	1544	1543	1544	1915	1800	1781	1907	1874	1852	1783	1697	1516	1378	1269	1160	1183	1154	1046	1043	1004	882
RI	Rhode Island	56	54	67	75	76	71	86	75	71	79	74	71	64	64	47	57	56	51	44	19	20
SC	South Carolina	881	965	1050	1127	1213	1214	1287	1280	1135	973	873	760	663	609	639	550	551	529	443	319	260
SD	South Dakota	84	112	90	98	117	110	91	91	108	83	95	88	60	55	53	46	74	87	68	87	95
TN	Tennessee	739	752	888	885	1003	933	963	877	783	530	509	448	481	408	336	280	251	249	273	240	273
TX	Texas	1504	1504	1603	1619	1597	1563	1541	1579	1442	1500	1496	1482	1507	1513	1457	1574	1619	1718	1906	1996	1988
UT	Utah	218	208	232	239	256	240	210	221	197	192	184	192	176	181	175	180	160	169	194	182	183
VT	Vermont	62	52	88	111	89	96	98	83	99	81	89	51	67	56	35	40	NaN	NaN	38	32	33
VA	Virginia	825	851	898	937	911	957	917	780	704	596	602	583	509	398	411	399	424	471	482	542	484
WA	Washington	529	556	608	644	675	686	577	522	499	464	332	178	181	168	170	166	170	168	138	131	159
WV	West Virginia	405	417	453	548	507	501	559	619	599	572	561	492	497	436	425	459	433	434	430	387	385
WI	Wisconsin	133	175	222	900	939	908	919	885	853	850	731	656	651	537	540	549	513	497	487	534	436
WY	Wyoming	44	36	34	40	42	48	43	46	40	29	25	39	29	40	30	22	27	37	30	NaN	24

## Sheet: Age9
ST	State\Report Year	1991	1992	1993	1994	1995	1996	1997	1998	1999	2000	2001	2002	2003	2004	2005	2006	2007	2008	2009	2010	2011
AL	Alabama	1573	1571	1644	1710	1670	1528	1625	1599	1500	1411	1052	824	631	520	448	448	392	375	450	435	404
AK	Alaska	15	29	36	57	52	62	61	61	67	61	62	53	48	39	56	41	45	47	49	39	47
AZ	Arizona	382	404	444	456	516	549	511	508	545	553	575	536	571	592	569	585	573	529	565	511	511
AR	Arkansas	602	617	662	811	831	828	864	833	819	757	795	702	732	616	569	478	447	423	411	354	393
CA	California	1928	1949	1875	2020	2107	2186	2343	2450	2494	2561	2702	2621	2585	2539	2366	2302	2298	2231	2278	2241	2205
CO	Colorado	143	144	150	206	223	206	222	220	233	218	239	237	239	185	224	209	175	196	207	154	199
CT	Connecticut	242	222	247	295	290	289	279	294	258	252	188	194	181	180	155	133	120	124	129	118	128
DE	Delaware	47	71	74	131	134	135	153	138	167	150	169	160	173	114	143	137	134	113	124	95	128
DC	District of Columbia	NaN	NaN	6	64	87	83	85	88	102	108	92	111	68	81	62	64	37	54	57	30	44
FL	Florida	2259	1980	2199	2771	2837	2837	3045	3072	2992	2755	2710	2489	2382	2208	2062	2002	1934	1806	1675	1458	1482
GA	Georgia	1706	1816	1852	2071	2103	2172	2252	2336	2307	2226	2089	1850	1800	1625	1481	1374	1340	1267	1226	1100	1221
HI	Hawaii	98	111	127	146	177	162	216	231	209	192	151	140	112	105	93	85	90	83	88	105	99
ID	Idaho	217	215	223	209	217	236	191	177	167	128	108	117	82	101	112	109	116	110	128	110	146
IL	Illinois	893	940	1065	1878	1850	1922	1985	1985	2001	2055	2117	1929	1818	1717	1501	1416	1465	1389	1289	1218	1097
IN	Indiana	1189	1172	1216	1599	1555	1724	1732	1727	1743	1781	1644	1760	1527	1526	1420	1324	1319	1295	1187	1138	1021
IA	Iowa	840	815	912	1005	1104	1097	1193	1272	1399	1407	1424	879	847	791	790	800	815	838	831	872	871
KS	Kansas	373	383	360	412	418	426	419	424	368	423	338	327	298	307	259	258	242	226	220	224	209
KY	Kentucky	1276	1219	1274	1408	1482	1481	1437	1308	1443	1466	1470	1345	1295	1333	1388	1305	1316	1263	1343	1126	1131
LA	Louisiana	819	771	934	959	921	930	929	952	882	825	783	735	671	664	558	579	551	565	592	553	524
ME	Maine	111	87	93	96	93	68	96	68	74	67	47	40	43	38	49	37	43	39	45	42	27
MD	Maryland	385	414	446	443	486	500	521	476	457	497	483	438	431	335	281	296	286	293	272	294	284
MA	Massachusetts	2502	931	910	1021	1018	1024	1042	1093	1044	956	638	547	564	574	609	570	473	468	458	406	415
MI	Michigan	986	1014	1219	1551	1591	1631	1571	1843	1885	1910	1856	1749	1670	1620	1601	1490	1393	1291	1242	1162	1154
MN	Minnesota	755	741	751	770	747	685	733	718	679	720	699	603	610	579	576	547	531	510	547	540	522
MS	Mississippi	431	453	459	498	457	489	461	398	399	392	346	300	310	307	245	257	264	263	292	212	182
MO	Missouri	820	749	797	915	879	953	944	973	964	907	884	832	727	696	760	720	699	721	694	678	620
MT	Montana	82	85	94	87	99	97	75	96	109	94	70	83	90	70	65	60	70	81	70	71	32
NE	Nebraska	340	393	385	441	411	447	447	457	450	433	395	355	335	349	334	346	300	314	269	261	234
NV	Nevada	96	91	116	113	129	106	131	137	121	113	117	151	137	123	152	141	128	120	120	121	144
NH	New Hampshire	47	51	57	63	60	61	62	53	62	64	46	49	38	37	52	45	29	36	31	34	30
NJ	New Jersey	210	245	256	258	264	287	283	286	322	360	386	401	398	363	347	333	322	397	313	303	297
NM	New Mexico	143	132	145	125	152	130	150	127	134	112	125	101	88	85	86	116	84	105	112	124	105
NY	New York	1015	985	1096	1219	1200	1199	1172	1143	1100	1044	979	924	862	826	753	716	647	592	626	670	634
NC	North Carolina	1616	1561	1827	2011	2373	2108	2412	2340	2322	2322	2168	2040	1878	1638	1576	1532	1491	1396	1335	1248	1187
ND	North Dakota	39	59	77	87	102	91	84	69	68	97	79	67	53	51	43	51	48	47	44	40	36
OH	Ohio	3111	3438	3564	3831	3912	3859	3833	3906	3984	3987	3731	3478	2935	2526	2253	2085	2049	1925	1910	1722	1495
OK	Oklahoma	997	950	972	900	818	731	708	743	667	651	608	566	511	486	424	455	424	435	451	496	462
OR	Oregon	116	134	131	300	305	275	268	280	320	273	278	261	249	255	228	233	220	241	246	238	220
PA	Pennsylvania	1709	1720	1696	2106	2090	2047	2028	2191	2076	2080	2022	1873	1717	1518	1430	1299	1275	1285	1168	1175	1087
RI	Rhode Island	52	59	58	81	79	82	84	98	78	90	96	92	78	72	78	56	63	64	62	56	30
SC	South Carolina	982	1013	1096	1174	1271	1394	1395	1412	1379	1206	1023	883	794	713	612	615	577	559	578	499	428
SD	South Dakota	102	85	120	105	109	112	118	93	99	111	86	94	77	57	59	58	66	95	96	87	102
TN	Tennessee	911	848	926	1057	1091	1184	1151	1179	1089	881	809	735	733	702	538	452	427	418	418	467	456
TX	Texas	1736	1612	1639	1702	1708	1731	1730	1710	1776	1614	1738	1685	1717	1662	1626	1620	1691	1942	2130	2311	2412
UT	Utah	232	228	235	239	237	257	242	203	227	192	204	188	203	208	201	199	208	180	200	226	222
VT	Vermont	85	66	71	115	122	102	98	102	109	97	99	91	75	68	80	57	NaN	NaN	54	52	33
VA	Virginia	901	931	1005	1099	1064	1066	1067	1101	1015	955	866	887	857	751	605	606	654	659	658	646	560
WA	Washington	594	523	581	686	679	654	632	568	510	468	483	383	350	399	395	358	340	375	330	301	353
WV	West Virginia	493	465	503	592	635	605	666	669	725	702	653	638	567	583	506	506	553	507	510	481	463
WI	Wisconsin	171	182	231	967	965	983	993	954	935	894	877	740	676	696	585	593	593	562	571	540	576
WY	Wyoming	40	55	41	35	38	43	44	47	61	39	26	33	39	32	41	29	34	31	38	NaN	21

## Sheet: Age10
ST	State\Report Year	1991	1992	1993	1994	1995	1996	1997	1998	1999	2000	2001	2002	2003	2004	2005	2006	2007	2008	2009	2010	2011
AL	Alabama	1810	1815	1833	1932	1874	1771	1726	1798	1750	1616	1283	1069	823	647	546	482	467	454	426	509	451
AK	Alaska	21	17	35	56	60	54	51	65	72	68	69	64	56	52	44	53	51	49	48	46	45
AZ	Arizona	359	410	444	477	513	556	569	542	537	589	591	586	598	608	633	586	615	564	563	547	534
AR	Arkansas	713	694	720	876	958	930	920	980	947	896	868	865	763	762	638	591	459	483	440	433	402
CA	California	1798	2025	1957	1984	2166	2189	2319	2539	2610	2654	2736	2858	2750	2693	2629	2453	2384	2372	2341	2341	2387
CO	Colorado	141	171	155	209	234	238	236	238	224	265	244	284	255	245	189	232	219	196	209	217	182
CT	Connecticut	223	253	256	269	323	321	287	291	300	265	257	200	190	186	179	153	149	131	136	138	137
DE	Delaware	49	54	79	137	138	135	150	165	142	179	157	169	171	170	123	143	153	139	112	119	113
DC	District of Columbia	2	1	2	75	91	100	110	75	104	108	129	97	121	146	93	104	56	65	66	61	36
FL	Florida	2463	2085	2330	2779	3056	3141	3000	3307	3316	3241	2962	2909	2607	2530	2308	2200	2093	1963	1848	1786	1585
GA	Georgia	1807	1879	2061	2117	2310	2290	2366	2450	2531	2478	2384	2213	2011	1844	1726	1550	1427	1397	1369	1346	1280
HI	Hawaii	91	111	141	153	167	194	181	247	256	215	206	151	146	124	126	106	84	103	85	98	104
ID	Idaho	207	228	213	237	212	232	239	170	174	157	161	128	135	123	133	154	139	156	147	147	143
IL	Illinois	981	1007	1130	1840	2003	1990	2049	2095	2129	2175	2240	2100	2119	1949	1825	1585	1478	1540	1480	1396	1305
IN	Indiana	1199	1318	1314	1561	1727	1681	1842	1823	1855	1828	1898	1770	1823	1591	1553	1443	1381	1361	1327	1226	1178
IA	Iowa	802	895	867	1024	1096	1196	1243	1322	1442	1566	1583	998	941	911	842	855	846	905	881	904	899
KS	Kansas	405	410	403	422	427	431	447	413	435	421	435	370	362	348	348	303	311	299	277	271	263
KY	Kentucky	1359	1432	1428	1450	1597	1645	1629	1611	1539	1632	1640	1684	1498	1442	1443	1505	1439	1388	1365	1413	1200
LA	Louisiana	839	916	950	1041	1046	1021	1002	1035	1032	951	904	879	809	727	635	587	620	588	609	626	604
ME	Maine	100	112	89	93	102	87	76	92	69	86	64	54	51	48	50	53	43	45	45	49	51
MD	Maryland	396	421	425	458	533	504	546	553	509	486	568	522	462	455	338	305	311	345	324	300	327
MA	Massachusetts	2480	915	923	994	1029	1030	1072	1102	1113	1072	1161	934	1008	921	966	1004	898	813	759	799	760
MI	Michigan	1008	1050	1127	1607	1653	1663	1799	1795	1997	2052	2067	2016	1872	1780	1739	1665	1519	1491	1374	1347	1287
MN	Minnesota	744	764	726	742	787	783	701	747	714	736	731	705	642	604	578	589	566	554	562	594	561
MS	Mississippi	518	475	513	560	570	514	522	488	422	437	409	375	334	354	346	271	286	302	313	340	271
MO	Missouri	795	854	799	948	995	940	1015	957	980	1031	985	934	879	805	786	819	779	774	803	775	756
MT	Montana	93	90	89	76	87	110	88	70	97	111	86	76	90	75	72	73	62	78	90	81	39
NE	Nebraska	357	378	434	424	470	456	477	467	457	484	447	415	369	372	387	362	367	339	305	266	269
NV	Nevada	115	100	115	135	110	135	123	138	135	125	130	135	158	144	130	147	137	137	118	128	121
NH	New Hampshire	68	56	42	56	75	74	79	68	58	75	79	68	57	49	49	58	56	56	46	45	41
NJ	New Jersey	238	226	338	290	290	291	288	314	349	376	440	461	449	420	393	344	361	463	314	337	317
NM	New Mexico	138	139	139	164	153	155	151	160	136	131	123	122	114	112	98	128	138	111	140	165	160
NY	New York	1158	1124	1251	1278	1259	1257	1229	1198	1154	1095	1027	968	904	866	788	751	722	694	685	704	742
NC	North Carolina	1645	1760	1794	2108	2193	2552	2266	2563	2583	2583	2493	2403	2175	1938	1752	1662	1603	1561	1527	1454	1378
ND	North Dakota	71	39	78	95	99	108	88	84	79	74	96	85	73	57	61	50	64	59	53	53	52
OH	Ohio	3484	3666	3834	4009	4234	4257	4219	4243	4433	4490	4355	4148	3600	3104	2632	2383	2196	2111	2007	2009	1860
OK	Oklahoma	993	1085	1045	979	887	820	737	758	770	685	653	646	593	524	505	462	451	432	473	493	532
OR	Oregon	124	136	167	297	339	282	301	280	310	357	293	279	273	267	276	256	249	227	266	257	249
PA	Pennsylvania	1823	1741	1831	2186	2199	2232	2228	2272	2412	2272	2296	2147	2000	1794	1625	1484	1350	1341	1329	1285	1206
RI	Rhode Island	81	61	62	68	87	86	95	94	105	105	100	99	102	85	78	82	55	65	72	65	57
SC	South Carolina	1066	1131	1113	1197	1264	1364	1509	1488	1490	1435	1239	1064	880	838	681	570	661	595	577	616	585
SD	South Dakota	117	102	96	123	107	99	115	111	98	95	118	81	82	86	58	63	75	82	113	109	95
TN	Tennessee	880	1000	1041	1105	1274	1257	1347	1239	1261	1171	1097	986	1054	886	696	605	546	509	512	536	590
TX	Texas	1614	1807	1763	1744	1810	1820	1813	1809	1857	1842	1832	1889	1934	1888	1809	1739	1773	1950	2247	2535	2712
UT	Utah	220	252	234	253	237	251	261	242	215	239	207	212	178	221	225	224	218	225	201	223	226
VT	Vermont	67	81	74	107	119	117	100	98	100	105	104	101	97	87	67	82	NaN	NaN	40	58	55
VA	Virginia	919	1019	1032	1137	1178	1158	1117	1171	1226	1185	1055	1081	953	908	816	625	649	701	712	703	698
WA	Washington	547	575	561	609	708	606	640	613	542	497	490	488	431	397	402	414	371	343	377	358	324
WV	West Virginia	547	525	513	541	624	705	713	734	735	803	775	698	704	608	629	547	533	598	540	578	514
WI	Wisconsin	241	222	223	939	1009	993	1026	1027	1015	977	939	894	775	714	728	632	607	651	634	599	572
WY	Wyoming	49	42	58	40	46	49	54	52	51	62	40	29	36	39	37	35	37	40	34	NaN	35

## Sheet: Age11
ST	State\Report Year	1991	1992	1993	1994	1995	1996	1997	1998	1999	2000	2001	2002	2003	2004	2005	2006	2007	2008	2009	2010	2011
AL	Alabama	2177	1995	2060	2056	2046	1952	1874	1836	1889	1835	1476	1241	1032	763	660	553	492	514	487	460	538
AK	Alaska	32	23	17	52	53	62	57	53	69	71	69	77	66	59	55	44	56	50	53	48	43
AZ	Arizona	428	375	480	473	507	534	545	556	535	569	636	609	616	645	653	650	584	552	568	560	586
AR	Arkansas	776	772	829	930	980	1044	1049	1001	1039	1024	995	955	938	789	803	644	564	500	498	490	454
CA	California	1821	1900	2054	2074	2151	2238	2323	2439	2612	2743	2852	2861	2994	2857	2732	2669	2550	2421	2477	2466	2460
CO	Colorado	167	149	190	226	229	258	257	253	265	262	288	254	298	277	246	205	237	223	205	214	236
CT	Connecticut	284	234	280	273	289	335	344	300	279	301	284	258	200	197	205	191	175	177	145	144	156
DE	Delaware	39	51	61	166	156	136	136	169	184	160	199	177	185	170	177	127	153	159	136	112	128
DC	District of Columbia	3	1	1	93	99	114	115	105	102	149	132	158	132	127	145	135	67	62	67	74	67
FL	Florida	2368	2145	2363	2786	2919	3256	3305	3218	3472	3469	3433	3098	3026	2688	2553	2413	2235	2100	1981	1896	1866
GA	Georgia	1984	1984	2106	2243	2279	2423	2468	2525	2619	2707	2594	2528	2310	2067	1879	1744	1562	1442	1424	1423	1408
HI	Hawaii	90	109	143	176	178	181	209	200	269	258	206	205	169	148	139	135	118	78	107	91	99
ID	Idaho	226	240	232	235	245	238	215	217	164	173	156	158	131	153	132	154	143	153	164	150	164
IL	Illinois	988	1106	1181	1848	1976	2133	2100	2177	2224	2305	2374	2293	2229	2223	2056	1908	1628	1536	1598	1512	1429
IN	Indiana	1285	1265	1408	1641	1692	1769	1746	1937	1880	1958	1912	1939	1819	1875	1626	1562	1452	1368	1376	1354	1229
IA	Iowa	911	864	938	930	1076	1181	1278	1339	1410	1544	1672	1061	1032	980	922	872	867	880	894	906	905
KS	Kansas	397	414	423	459	434	437	461	445	415	471	427	445	374	374	339	358	303	331	316	289	266
KY	Kentucky	1530	1474	1634	1520	1531	1677	1714	1705	1711	1631	1754	1726	1777	1628	1586	1501	1609	1461	1472	1388	1423
LA	Louisiana	937	882	1056	1018	1097	1111	1050	1063	1069	1083	994	949	948	851	667	667	634	653	629	633	671
ME	Maine	128	101	117	89	96	102	95	83	98	79	82	73	55	60	56	54	66	49	50	54	48
MD	Maryland	368	399	442	433	505	539	535	570	571	552	542	592	547	474	466	357	298	380	381	358	341
MA	Massachusetts	2405	884	877	976	981	1016	1036	1096	1102	1108	1121	1007	1094	1063	1017	1010	997	931	847	837	857
MI	Michigan	1049	1043	1125	1506	1695	1670	1744	1954	1874	2146	2171	2141	2139	1982	1866	1800	1673	1557	1540	1399	1433
MN	Minnesota	765	750	747	767	750	786	811	712	747	754	742	748	731	695	604	607	600	593	571	589	630
MS	Mississippi	619	537	552	606	664	611	535	531	493	449	465	448	385	365	372	373	284	313	328	326	355
MO	Missouri	938	836	921	921	1031	1046	1003	1019	1129	1017	1011	1023	989	978	905	810	850	808	818	834	834
MT	Montana	74	99	86	89	84	116	97	90	74	93	115	94	82	101	71	73	69	62	75	87	42
NE	Nebraska	338	390	412	471	469	495	463	505	498	478	475	477	436	399	385	409	388	383	353	297	269
NV	Nevada	109	109	100	127	131	123	132	112	144	148	131	139	139	161	146	130	156	144	136	128	123
NH	New Hampshire	70	66	57	50	68	78	83	85	72	63	81	87	74	57	54	53	55	61	67	56	58
NJ	New Jersey	242	243	295	355	306	321	316	341	391	444	461	500	523	495	461	400	397	498	374	340	377
NM	New Mexico	156	147	140	147	163	159	160	146	167	146	136	127	144	127	117	117	144	142	126	156	185
NY	New York	1298	1260	1403	1475	1453	1451	1417	1382	1332	1262	1185	1117	1042	999	910	867	785	730	795	768	756
NC	North Carolina	1672	1739	1944	2007	2234	2308	2635	2415	2728	2728	2679	2595	2451	2226	2041	1794	1663	1608	1626	1598	1531
ND	North Dakota	84	76	54	102	99	113	108	91	88	80	83	99	85	75	52	63	52	65	57	57	52
OH	Ohio	3608	3853	3968	4166	4350	4526	4482	4528	4654	4861	4652	4663	4248	3643	3115	2642	2424	2204	2092	2028	2003
OK	Oklahoma	1052	1028	1161	1001	943	847	820	748	751	749	699	674	640	590	546	534	477	452	466	499	533
OR	Oregon	108	129	163	320	347	318	302	312	324	339	360	303	312	285	274	293	261	266	249	278	281
PA	Pennsylvania	2106	1874	1881	2298	2204	2256	2349	2364	2352	2511	2434	2370	2244	2031	1890	1678	1545	1444	1395	1429	1293
RI	Rhode Island	69	77	55	83	74	84	84	101	93	122	100	104	103	115	83	92	81	54	65	58	63
SC	South Carolina	1162	1128	1261	1233	1289	1367	1426	1580	1552	1525	1469	1251	1049	945	807	623	595	669	621	598	634
SD	South Dakota	120	117	113	108	126	110	91	102	105	98	100	115	84	83	84	65	70	87	91	117	109
TN	Tennessee	1037	939	1132	1176	1227	1379	1389	1406	1346	1322	1320	1194	1168	1129	798	738	622	587	542	550	604
TX	Texas	1734	1660	1882	1860	1820	1845	1950	1966	1934	1890	1982	1929	2046	2057	1979	1921	1838	1947	2231	2509	2793
UT	Utah	265	215	290	253	226	241	243	273	240	207	235	225	229	189	239	237	232	237	235	220	231
VT	Vermont	78	67	83	107	111	112	117	102	117	130	108	113	109	101	81	81	NaN	NaN	63	39	63
VA	Virginia	994	1014	1124	1142	1217	1227	1181	1227	1265	1266	1156	1144	1146	991	927	810	662	685	754	742	705
WA	Washington	592	549	590	601	601	691	616	625	604	553	495	485	499	438	405	395	429	373	368	390	373
WV	West Virginia	580	584	540	618	582	697	769	787	797	788	859	831	749	740	616	664	570	582	628	556	619
WI	Wisconsin	281	288	294	895	969	1064	1002	1041	1074	1038	967	938	911	798	753	741	665	631	683	652	637
WY	Wyoming	36	51	45	53	49	52	47	57	47	45	63	42	34	35	37	28	56	44	38	NaN	36

## Sheet: Age12
ST	State\Report Year	1991	1992	1993	1994	1995	1996	1997	1998	1999	2000	2001	2002	2003	2004	2005	2006	2007	2008	2009	2010	2011
AL	Alabama	2338	2317	2169	2262	2163	2083	2047	2005	1890	1972	1618	1404	1154	948	767	631	569	515	563	525	492
AK	Alaska	27	34	32	38	60	60	61	57	51	77	75	78	70	66	52	46	42	55	43	54	47
AZ	Arizona	407	453	389	488	483	529	547	544	575	591	607	639	657	668	684	659	678	591	562	571	582
AR	Arkansas	851	855	902	1010	1036	1110	1130	1084	1070	1107	1125	1097	1050	984	793	799	649	557	499	505	490
CA	California	1824	1865	1933	2106	2134	2247	2336	2428	2540	2747	2888	3000	2977	3094	2896	2766	2696	2623	2516	2582	2603
CO	Colorado	151	165	167	243	249	241	270	282	280	289	282	298	273	301	280	255	207	241	228	196	241
CT	Connecticut	250	301	266	319	309	304	359	358	305	286	310	261	270	206	198	202	202	180	188	140	163
DE	Delaware	49	39	70	131	163	152	146	145	182	180	183	202	185	187	172	174	131	147	164	125	120
DC	District of Columbia	4	1	7	63	113	62	108	116	128	113	172	146	123	136	127	111	85	68	64	69	64
FL	Florida	2000	2036	2399	2823	2923	3073	3394	3377	3354	3585	3573	3551	3161	3117	2720	2635	2417	2219	2054	1976	1945
GA	Georgia	1988	2084	2133	2332	2368	2446	2558	2626	2636	2751	2776	2701	2615	2399	2151	1905	1719	1570	1453	1474	1465
HI	Hawaii	107	100	125	177	206	208	220	234	222	265	249	199	205	159	160	136	133	119	83	107	96
ID	Idaho	213	229	252	243	245	256	241	224	190	172	191	174	169	144	155	157	169	150	161	175	169
IL	Illinois	1072	1131	1237	1953	1954	2079	2253	2197	2287	2376	2447	2416	2422	2304	2316	2122	1907	1680	1563	1634	1526
IN	Indiana	1444	1391	1379	1696	1732	1743	1829	1806	1989	1956	2002	1988	1962	1832	1892	1664	1594	1470	1352	1375	1346
IA	Iowa	898	967	905	1010	1013	1146	1248	1370	1446	1507	1663	1140	1080	1050	978	940	874	890	870	902	892
KS	Kansas	396	432	411	481	452	459	451	471	430	464	479	438	472	374	364	328	359	302	329	322	277
KY	Kentucky	1580	1631	1635	1687	1593	1567	1729	1758	1753	1763	1708	1796	1802	1834	1639	1620	1518	1575	1474	1418	1359
LA	Louisiana	945	973	1023	1137	1088	1141	1181	1093	1101	1102	1090	1033	958	999	765	739	718	645	678	659	657
ME	Maine	165	117	101	132	85	89	103	103	93	96	76	82	81	60	68	62	55	66	56	53	53
MD	Maryland	406	403	430	433	485	520	564	561	595	592	583	560	637	561	468	454	356	346	383	386	387
MA	Massachusetts	2331	1130	1124	1222	1258	1266	1342	1394	1397	1421	1163	1112	1167	1195	1076	1030	998	1032	986	898	892
MI	Michigan	1045	1071	1165	1576	1607	1752	1713	1858	2021	1962	2232	2236	2286	2216	2089	1919	1789	1701	1579	1550	1454
MN	Minnesota	697	781	768	794	822	754	796	800	707	802	736	766	768	727	695	639	590	606	618	590	604
MS	Mississippi	656	696	664	680	690	678	604	547	525	516	452	466	454	408	398	393	379	301	331	344	341
MO	Missouri	949	943	879	1067	929	1089	1108	1028	1053	1072	1068	1083	1070	924	1011	897	810	885	831	829	863
MT	Montana	98	85	102	82	90	108	98	94	90	81	95	117	93	86	95	74	74	76	77	73	54
NE	Nebraska	315	358	426	444	498	484	510	473	494	506	495	484	482	464	395	408	440	407	370	306	277
NV	Nevada	89	91	128	117	123	122	120	132	124	140	159	147	141	154	159	136	136	163	166	145	136
NH	New Hampshire	63	79	69	69	62	65	90	87	93	88	72	81	108	82	58	56	67	68	70	65	65
NJ	New Jersey	303	274	330	314	387	307	337	358	414	458	526	511	520	558	507	467	429	524	399	403	363
NM	New Mexico	153	167	156	147	164	167	169	158	162	174	154	144	142	160	136	132	131	157	149	147	163
NY	New York	1119	1044	1126	1186	1198	1185	1170	1168	1172	1148	1146	1142	1128	1119	1099	1076	951	840	808	857	813
NC	North Carolina	1749	1761	1971	2123	2187	2330	2437	2759	2526	2526	2864	2761	2643	2506	2276	2037	1761	1658	1622	1655	1631
ND	North Dakota	89	81	89	72	108	98	107	105	95	99	85	84	99	95	69	60	64	61	66	61	53
OH	Ohio	3650	4004	4079	4270	4323	4547	4734	4699	4818	4862	4922	4869	4658	4228	3578	3049	2601	2291	2172	2070	2010
OK	Oklahoma	1062	1116	1086	1119	935	912	825	799	732	717	740	687	679	655	588	550	513	485	461	461	507
OR	Oregon	139	126	140	315	374	316	337	327	359	348	340	370	329	321	311	294	304	276	289	278	304
PA	Pennsylvania	2287	2094	1972	2307	2369	2299	2333	2457	2406	2443	2645	2519	2454	2271	2108	1942	1669	1587	1468	1493	1426
RI	Rhode Island	87	71	70	68	83	77	90	89	98	99	109	101	109	103	111	80	83	71	54	56	64
SC	South Carolina	1153	1217	1214	1353	1335	1416	1484	1501	1579	1573	1578	1477	1264	1060	968	760	638	587	671	633	616
SD	South Dakota	130	110	119	124	123	129	103	110	116	115	101	115	113	91	89	91	85	76	89	98	126
TN	Tennessee	1141	1106	1067	1296	1330	1341	1502	1432	1514	1357	1437	1419	1260	1234	1028	818	731	630	600	571	594
TX	Texas	1684	1756	1755	1956	1874	1894	1921	1996	2039	1986	2027	2105	2083	2150	2156	2048	2007	1960	2177	2475	2749
UT	Utah	208	232	246	300	241	238	242	218	253	250	230	242	233	235	214	241	251	255	231	236	236
VT	Vermont	70	71	67	124	118	108	119	108	119	109	129	116	124	119	109	77	NaN	NaN	69	68	46
VA	Virginia	999	1061	1108	1229	1220	1244	1295	1245	1298	1299	1277	1293	1213	1162	1003	907	827	710	718	759	756
WA	Washington	529	580	597	638	623	582	659	583	597	591	570	486	488	502	424	410	415	427	351	380	413
WV	West Virginia	629	603	631	623	650	598	754	842	843	833	816	891	867	795	762	648	679	572	574	654	582
WI	Wisconsin	322	356	350	881	942	1001	1055	987	1068	1086	1053	996	952	931	839	788	757	690	679	703	676
WY	Wyoming	39	43	59	49	59	50	53	51	61	47	57	62	44	37	37	35	36	56	47	NaN	36

## Sheet: Age13
ST	State\Report Year	1991	1992	1993	1994	1995	1996	1997	1998	1999	2000	2001	2002	2003	2004	2005	2006	2007	2008	2009	2010	2011
AL	Alabama	2383	2465	2466	2352	2354	2186	2155	2123	1996	1880	1728	1551	1293	1094	895	736	613	549	533	574	526
AK	Alaska	20	32	45	50	40	68	66	68	62	61	75	76	77	71	62	55	54	41	57	48	53
AZ	Arizona	391	413	476	461	518	506	547	564	591	596	584	613	685	657	679	689	677	625	568	573	578
AR	Arkansas	863	885	974	1108	1140	1147	1156	1154	1117	1105	1148	1178	1167	1062	953	769	756	605	545	474	512
CA	California	1673	1869	1866	1965	2190	2206	2333	2377	2493	2674	2842	2967	3109	3000	3097	2971	2857	2720	2704	2577	2631
CO	Colorado	198	178	170	242	274	275	252	280	292	279	304	276	313	278	282	299	246	209	251	230	214
CT	Connecticut	276	251	299	289	319	314	336	366	370	308	290	314	256	250	207	185	192	207	185	190	152
DE	Delaware	47	47	51	157	130	168	164	157	163	180	198	210	225	190	188	168	169	132	143	156	136
DC	District of Columbia	8	NaN	3	81	93	91	95	98	145	122	133	180	177	159	104	105	138	77	83	66	74
FL	Florida	2354	2075	2210	2804	2949	3022	3158	3494	3493	3460	3647	3624	3568	3191	3126	2833	2677	2363	2223	2055	2039
GA	Georgia	1952	2044	2257	2376	2442	2517	2586	2675	2751	2733	2873	2834	2755	2641	2460	2125	1891	1705	1577	1466	1501
HI	Hawaii	109	106	116	147	191	225	226	250	244	217	269	229	200	194	150	159	134	135	111	73	100
ID	Idaho	207	221	257	272	251	248	236	220	205	184	165	195	167	173	150	184	171	180	161	157	180
IL	Illinois	1063	1141	1267	2071	2026	2006	2142	2347	2301	2395	2467	2456	2503	2488	2333	2275	2088	1909	1684	1574	1565
IN	Indiana	1342	1494	1478	1647	1737	1783	1779	1875	1828	2030	1995	2067	2027	1974	1815	1848	1644	1543	1443	1340	1355
IA	Iowa	800	942	1005	977	1085	1072	1213	1301	1433	1507	1590	1147	1154	1090	1056	973	945	895	890	875	885
KS	Kansas	416	401	444	439	490	475	480	455	458	446	457	478	446	490	388	360	331	346	310	323	299
KY	Kentucky	1650	1669	1781	1647	1773	1593	1589	1765	1782	1837	1857	1725	1849	1875	1856	1664	1616	1512	1559	1455	1389
LA	Louisiana	904	980	1091	1064	1208	1110	1173	1202	1109	1135	1118	1101	1045	995	892	803	751	726	662	675	664
ME	Maine	170	156	114	111	123	87	88	118	111	97	110	81	87	77	66	74	70	67	73	55	57
MD	Maryland	359	416	405	434	493	506	532	587	569	607	582	609	573	608	558	471	452	415	353	396	398
MA	Massachusetts	2205	1113	1109	1210	1196	1225	1274	1369	1352	1378	1211	1171	1300	1236	1200	1092	1057	997	1023	984	896
MI	Michigan	1014	1090	1136	1592	1626	1643	1724	1866	1916	2092	2035	2311	2351	2371	2249	2091	1925	1798	1759	1567	1575
MN	Minnesota	731	711	758	766	791	818	757	779	808	770	790	783	797	802	745	717	642	618	616	631	605
MS	Mississippi	620	737	798	828	753	712	680	611	579	546	515	471	467	483	437	395	405	392	318	343	356
MO	Missouri	1001	932	970	1004	1118	1012	1132	1090	1094	1111	1109	1100	1115	1135	1106	1035	919	803	914	850	872
MT	Montana	82	103	90	82	92	124	96	111	94	102	75	92	110	90	83	92	81	65	75	70	38
NE	Nebraska	276	318	390	450	495	527	500	535	488	499	504	513	497	497	456	423	396	411	376	353	289
NV	Nevada	91	85	109	130	117	136	131	118	138	132	162	154	155	164	151	169	148	140	169	161	154
NH	New Hampshire	43	58	71	82	91	71	65	92	91	90	94	74	95	109	84	65	63	61	76	77	65
NJ	New Jersey	296	308	352	347	323	413	335	348	437	485	522	549	551	563	589	538	509	478	427	411	426
NM	New Mexico	135	157	168	168	170	161	173	157	169	153	173	155	153	149	164	144	135	141	170	161	157
NY	New York	1083	1009	1088	1099	1111	1098	1084	1083	1086	1064	1062	1058	1046	1037	1019	997	1093	967	880	835	891
NC	North Carolina	1677	1852	1924	2130	2316	2282	2436	2545	2846	2846	2905	2936	2803	2631	2472	2244	1987	1744	1663	1652	1643
ND	North Dakota	89	94	99	95	77	112	99	109	111	101	92	91	82	99	84	83	62	68	64	67	72
OH	Ohio	3816	4039	4295	4329	4456	4512	4646	4755	4821	4853	4909	5045	4842	4526	4092	3489	2960	2467	2247	2094	2034
OK	Oklahoma	1028	1090	1155	1083	1048	888	875	804	796	742	707	735	692	679	659	559	523	512	489	472	475
OR	Oregon	115	126	146	259	346	321	338	351	343	373	377	364	364	337	326	342	314	311	290	304	287
PA	Pennsylvania	2342	2206	2171	2313	2320	2394	2331	2418	2399	2503	2554	2655	2534	2429	2259	2126	1961	1709	1616	1527	1492
RI	Rhode Island	57	88	76	78	73	92	78	96	89	98	102	112	105	117	104	109	81	80	70	70	66
SC	South Carolina	1196	1205	1312	1356	1423	1442	1482	1560	1576	1626	1637	1542	1436	1234	1053	925	779	646	568	684	622
SD	South Dakota	126	120	111	127	131	126	135	99	116	126	101	103	117	125	89	104	106	90	87	88	105
TN	Tennessee	1108	1175	1167	1200	1436	1397	1450	1503	1463	1488	1428	1472	1400	1307	1121	980	770	721	602	629	580
TX	Texas	1651	1739	1875	1834	2000	1965	1941	1998	2080	2114	2076	2069	2271	2128	2208	2163	2084	2080	2103	2339	2627
UT	Utah	231	232	243	271	311	261	236	249	232	245	245	231	251	238	248	212	258	261	260	250	255
VT	Vermont	63	76	76	122	120	118	114	122	130	105	105	125	115	111	121	103	NaN	NaN	82	67	67
VA	Virginia	1028	1053	1117	1188	1293	1244	1317	1365	1302	1317	1268	1399	1313	1229	1168	1005	895	836	711	721	794
WA	Washington	546	508	570	635	631	575	578	648	548	597	554	546	466	489	503	414	414	418	439	358	389
WV	West Virginia	648	673	633	725	681	698	671	819	868	892	862	865	930	882	794	771	640	679	584	580	656
WI	Wisconsin	322	379	416	966	928	986	1035	1069	1052	1090	1102	1032	1008	969	920	870	780	755	702	686	713
WY	Wyoming	45	44	43	55	52	62	52	51	48	53	50	54	63	47	35	32	45	37	57	NaN	41

## Sheet: Age14
ST	State\Report Year	1991	1992	1993	1994	1995	1996	1997	1998	1999	2000	2001	2002	2003	2004	2005	2006	2007	2008	2009	2010	2011
AL	Alabama	2474	2437	2585	2649	2390	2344	2182	2195	2115	2016	1685	1609	1405	1199	1066	870	718	622	558	539	580
AK	Alaska	24	20	27	52	46	41	73	67	66	69	60	80	72	74	66	60	54	57	41	58	50
AZ	Arizona	354	404	416	466	457	490	480	545	557	576	628	591	656	715	686	683	698	628	610	565	589
AR	Arkansas	870	898	952	1129	1185	1192	1197	1165	1177	1150	1144	1190	1199	1142	1045	906	739	729	579	498	474
CA	California	1728	1766	1840	1944	2034	2133	2271	2347	2429	2609	2744	2909	3028	3189	3009	3089	2947	2868	2761	2747	2621
CO	Colorado	163	201	191	242	274	276	279	260	282	310	303	311	297	325	279	291	292	240	213	242	237
CT	Connecticut	284	277	290	323	298	330	332	342	322	350	316	295	317	260	256	218	209	206	210	192	192
DE	Delaware	40	41	65	137	174	139	176	178	152	165	175	199	217	220	171	167	163	148	120	125	142
DC	District of Columbia	14	2	6	58	104	70	104	98	132	118	120	152	138	136	149	150	115	116	82	77	72
FL	Florida	2472	1946	2241	2470	2863	2968	3049	3183	3530	3573	3516	3696	3726	3554	3226	3100	2865	2612	2334	2222	2104
GA	Georgia	1971	1956	2114	2404	2416	2506	2576	2659	2748	2832	2806	2911	2876	2776	2652	2418	2070	1877	1683	1576	1463
HI	Hawaii	98	116	123	151	167	222	240	246	267	244	211	256	214	183	185	147	153	129	119	107	77
ID	Idaho	214	211	227	268	281	255	232	224	219	205	180	162	199	175	174	161	162	170	178	180	165
IL	Illinois	1148	1134	1280	2029	2124	2071	2075	2232	2426	2353	2424	2444	2491	2534	2377	2334	2217	2063	1862	1693	1474
IN	Indiana	1413	1343	1574	1725	1695	1773	1830	1790	1861	1832	2049	2034	2078	2018	1965	1811	1822	1593	1503	1407	1335
IA	Iowa	860	830	951	1048	1000	1127	1129	1228	1362	1481	1567	1088	1142	1154	1084	1051	955	935	882	884	860
KS	Kansas	344	408	409	495	464	505	494	466	437	493	467	458	473	426	475	395	364	340	338	306	309
KY	Kentucky	1771	1700	1782	1818	1678	1749	1635	1636	1814	1772	1831	1865	1776	1876	1875	1852	1650	1582	1484	1522	1422
LA	Louisiana	929	890	1069	1137	1079	1207	1138	1184	1204	1107	1138	1142	1116	1064	865	901	843	788	743	655	703
ME	Maine	132	157	142	102	111	122	89	98	114	106	100	117	84	97	79	68	72	71	69	70	60
MD	Maryland	360	352	429	393	469	468	514	569	604	564	604	579	606	551	593	545	459	487	391	351	408
MA	Massachusetts	2142	1064	1085	1199	1172	1189	1250	1286	1330	1317	1183	1208	1280	1317	1234	1206	1106	1055	1027	992	957
MI	Michigan	952	1046	1158	1587	1599	1646	1625	1895	1893	1944	2083	2067	2342	2347	2293	2243	2050	1867	1815	1720	1570
MN	Minnesota	776	735	713	783	793	818	844	760	818	844	755	806	796	805	808	736	743	666	640	634	621
MS	Mississippi	713	677	835	925	930	800	699	678	615	566	547	524	492	496	503	450	408	407	412	324	344
MO	Missouri	954	965	918	1051	1013	1129	1065	1144	1123	1061	1097	1114	1175	1141	1172	1085	1010	924	806	902	857
MT	Montana	94	86	106	76	88	110	97	88	112	105	96	75	90	118	88	83	90	79	70	77	51
NE	Nebraska	306	305	355	448	501	511	567	515	531	485	518	492	514	520	499	439	401	422	395	343	324
NV	Nevada	101	88	94	124	143	118	152	128	122	142	140	174	161	158	157	147	163	139	124	163	162
NH	New Hampshire	56	53	71	89	89	85	79	76	93	99	96	107	83	100	102	79	80	62	70	87	79
NJ	New Jersey	290	306	380	339	366	339	434	352	413	512	516	575	588	587	564	578	570	525	409	452	419
NM	New Mexico	152	142	164	183	176	173	172	168	154	183	158	175	153	166	152	159	142	139	136	165	166
NY	New York	1242	1157	1247	1287	1301	1286	1270	1268	1272	1246	1244	1239	1225	1214	1193	1168	1190	1084	994	899	864
NC	North Carolina	1687	1722	1997	2104	2301	2373	2368	2477	2601	2601	2698	2962	2965	2842	2668	2409	2192	1989	1742	1687	1624
ND	North Dakota	77	84	109	112	99	82	121	94	107	117	101	102	93	80	97	87	79	62	66	61	69
OH	Ohio	3608	3863	4169	4497	4420	4482	4558	4734	4824	4880	4810	4987	4976	4678	4330	3927	3316	2824	2380	2179	2052
OK	Oklahoma	1006	1034	1074	1056	989	977	855	834	792	782	745	706	723	682	646	695	558	517	517	462	484
OR	Oregon	102	115	140	299	326	316	347	328	371	351	382	388	371	392	343	340	349	323	323	311	322
PA	Pennsylvania	2294	2247	2195	2451	2268	2310	2351	2347	2338	2442	2498	2570	2643	2547	2432	2236	2064	1942	1716	1655	1485
RI	Rhode Island	60	54	97	73	80	74	98	81	92	103	99	106	116	112	115	105	103	83	82	74	68
SC	South Carolina	1234	1206	1302	1377	1453	1508	1535	1502	1564	1589	1708	1585	1538	1387	1197	965	905	757	653	570	695
SD	South Dakota	119	117	120	112	150	114	138	125	101	110	136	110	103	118	118	96	95	106	107	91	99
TN	Tennessee	1108	1103	1231	1319	1297	1426	1441	1463	1514	1447	1549	1451	1407	1427	1175	1100	927	727	705	622	661
TX	Texas	1649	1665	1823	1915	1856	2049	1981	2031	2058	2063	2171	2080	2109	2320	2165	2274	2214	2140	2191	2246	2390
UT	Utah	261	233	227	265	263	314	264	230	249	244	260	246	223	250	240	249	222	252	268	273	241
VT	Vermont	75	72	74	119	132	116	117	102	117	119	102	107	125	111	116	117	NaN	NaN	73	89	68
VA	Virginia	1054	1056	1142	1171	1217	1310	1289	1355	1381	1340	1268	1377	1409	1301	1231	1169	1016	913	826	718	710
WA	Washington	519	526	494	584	635	592	569	566	606	580	606	572	556	465	488	501	420	414	418	424	353
WV	West Virginia	756	657	716	720	763	748	762	735	868	909	905	894	885	951	893	783	756	647	679	583	580
WI	Wisconsin	407	355	447	919	979	1033	951	980	1034	1151	1126	1120	1052	1031	1003	976	867	796	798	715	699
WY	Wyoming	40	46	47	39	58	49	59	51	56	55	51	44	53	61	43	33	41	47	37	NaN	43

[truncated: 3 more sheets: Age15, Age16, Age17]
