# Supplementary material for: Diagnostic Substitution for Intellectual Disability: A Flawed Explanation for the Rise in Autism
Source: Springer Nature journal article supplement (doi:10.1007/s10803-017-3187-0), 2017-06-06
Supplement: MOESM9 [file 12340648]

## Sheet: Age5
ST	State\Report Year	1991	1992	1993	1994	1995	1996	1997	1998	1999	2000	2001	2002	2003	2004	2005	2006	2007	2008	2009	2010	2011
AL	Alabama	NaN	NaN	NaN	NaN	NaN	NaN	NaN	NaN	NaN	33	42	51	48	40	48	47	36	47	52	46	61
AK	Alaska	NaN	NaN	NaN	NaN	NaN	NaN	NaN	NaN	NaN	12	5	7	9	12	12	10	11	10	24	16	22
AZ	Arizona	NaN	NaN	NaN	NaN	NaN	NaN	NaN	NaN	NaN	40	56	67	78	71	112	107	102	120	160	65	75
AR	Arkansas	NaN	NaN	NaN	NaN	NaN	NaN	NaN	NaN	NaN	60	56	71	124	79	81	69	75	74	96	104	100
CA	California	NaN	NaN	NaN	NaN	NaN	NaN	NaN	NaN	NaN	589	612	602	675	714	732	791	807	871	935	949	1079
CO	Colorado	NaN	NaN	NaN	NaN	NaN	NaN	NaN	NaN	NaN	NaN	NaN	NaN	NaN	NaN	NaN	NaN	NaN	NaN	NaN	NaN	NaN
CT	Connecticut	NaN	NaN	NaN	NaN	NaN	NaN	NaN	NaN	NaN	79	82	85	74	85	97	59	101	102	107	111	117
DE	Delaware	NaN	NaN	NaN	NaN	NaN	NaN	NaN	NaN	NaN	NaN	NaN	NaN	NaN	NaN	36	38	38	35	39	37	34
DC	District of Columbia	NaN	NaN	NaN	NaN	NaN	NaN	NaN	NaN	NaN	12	17	17	7	NaN	NaN	17	7	12	17	24	29
FL	Florida	NaN	NaN	NaN	NaN	NaN	NaN	NaN	NaN	NaN	220	246	296	289	309	342	317	317	314	324	311	368
GA	Georgia	NaN	NaN	NaN	NaN	NaN	NaN	NaN	NaN	NaN	166	193	206	210	217	161	173	154	159	141	153	152
HI	Hawaii	NaN	NaN	NaN	NaN	NaN	NaN	NaN	NaN	NaN	40	46	34	41	51	41	42	41	34	50	28	32
ID	Idaho	NaN	NaN	NaN	NaN	NaN	NaN	NaN	NaN	NaN	13	14	15	13	21	26	24	19	28	33	36	32
IL	Illinois	NaN	NaN	NaN	NaN	NaN	NaN	NaN	NaN	NaN	299	308	290	340	345	372	406	350	329	329	270	320
IN	Indiana	NaN	NaN	NaN	NaN	NaN	NaN	NaN	NaN	NaN	120	146	163	155	157	170	208	193	214	253	270	289
IA	Iowa	NaN	NaN	NaN	NaN	NaN	NaN	NaN	NaN	NaN	7	3	8	11	10	8	8	NaN	NaN	NaN	NaN	NaN
KS	Kansas	NaN	NaN	NaN	NaN	NaN	NaN	NaN	NaN	NaN	60	42	57	75	89	47	47	53	49	67	61	55
KY	Kentucky	NaN	NaN	NaN	NaN	NaN	NaN	NaN	NaN	NaN	43	41	52	65	55	90	72	72	76	75	61	40
LA	Louisiana	NaN	NaN	NaN	NaN	NaN	NaN	NaN	NaN	NaN	33	60	99	115	120	101	96	88	93	94	119	166
ME	Maine	NaN	NaN	NaN	NaN	NaN	NaN	NaN	NaN	NaN	58	70	92	102	99	101	103	88	82	112	108	102
MD	Maryland	NaN	NaN	NaN	NaN	NaN	NaN	NaN	NaN	NaN	119	122	128	144	134	116	127	136	178	154	148	132
MA	Massachusetts	NaN	NaN	NaN	NaN	NaN	NaN	NaN	NaN	NaN	83	52	48	54	56	51	72	77	88	74	86	94
MI	Michigan	NaN	NaN	NaN	NaN	NaN	NaN	NaN	NaN	NaN	NaN	NaN	27	209	248	266	305	331	352	346	335	355
MN	Minnesota	NaN	NaN	NaN	NaN	NaN	NaN	NaN	NaN	NaN	44	56	48	56	47	50	58	66	56	66	56	70
MS	Mississippi	NaN	NaN	NaN	NaN	NaN	NaN	NaN	NaN	NaN	NaN	NaN	9	11	18	25	NaN	45	30	41	53	65
MO	Missouri	NaN	NaN	NaN	NaN	NaN	NaN	NaN	NaN	NaN	131	144	106	120	124	126	138	136	158	175	171	169
MT	Montana	NaN	NaN	NaN	NaN	NaN	NaN	NaN	NaN	NaN	7	15	4	11	NaN	9	7	8	8	5	9	9
NE	Nebraska	NaN	NaN	NaN	NaN	NaN	NaN	NaN	NaN	NaN	114	136	121	109	119	111	106	132	137	129	146	121
NV	Nevada	NaN	NaN	NaN	NaN	NaN	NaN	NaN	NaN	NaN	25	18	37	34	45	33	45	41	47	55	52	54
NH	New Hampshire	NaN	NaN	NaN	NaN	NaN	NaN	NaN	NaN	NaN	57	74	61	53	56	60	73	77	63	65	91	60
NJ	New Jersey	NaN	NaN	NaN	NaN	NaN	NaN	NaN	NaN	NaN	302	335	418	536	604	593	685	716	745	743	815	753
NM	New Mexico	NaN	NaN	NaN	NaN	NaN	NaN	NaN	NaN	NaN	23	24	30	32	34	39	31	40	30	46	13	14
NY	New York	NaN	NaN	NaN	NaN	NaN	NaN	NaN	NaN	NaN	375	909	NaN	NaN	NaN	NaN	1967	2322	2506	2830	2710	2634
NC	North Carolina	NaN	NaN	NaN	NaN	NaN	NaN	NaN	NaN	NaN	100	85	84	66	79	93	75	81	83	72	65	91
ND	North Dakota	NaN	NaN	NaN	NaN	NaN	NaN	NaN	NaN	NaN	4	12	14	18	17	20	9	12	NaN	23	5	19
OH	Ohio	NaN	NaN	NaN	NaN	NaN	NaN	NaN	NaN	NaN	NaN	NaN	NaN	NaN	NaN	NaN	NaN	167	361	391	301	410
OK	Oklahoma	NaN	NaN	NaN	NaN	NaN	NaN	NaN	NaN	NaN	9	21	29	26	28	40	44	42	44	57	66	67
OR	Oregon	NaN	NaN	NaN	NaN	NaN	NaN	NaN	NaN	NaN	98	89	89	100	104	106	101	110	116	117	121	148
PA	Pennsylvania	NaN	NaN	NaN	NaN	NaN	NaN	NaN	NaN	NaN	54	77	130	148	186	202	233	210	252	340	411	442
RI	Rhode Island	NaN	NaN	NaN	NaN	NaN	NaN	NaN	NaN	NaN	21	37	54	39	38	21	25	35	10	19	14	15
SC	South Carolina	NaN	NaN	NaN	NaN	NaN	NaN	NaN	NaN	NaN	62	880	877	1002	48	60	43	49	28	31	35	44
SD	South Dakota	NaN	NaN	NaN	NaN	NaN	NaN	NaN	NaN	NaN	5	6	14	7	6	16	10	11	9	12	15	21
TN	Tennessee	NaN	NaN	NaN	NaN	NaN	NaN	NaN	NaN	NaN	98	88	93	92	106	107	119	116	126	154	143	147
TX	Texas	NaN	NaN	NaN	NaN	NaN	NaN	NaN	NaN	NaN	941	977	937	1045	1075	1142	1155	1087	1167	1148	1153	1156
UT	Utah	NaN	NaN	NaN	NaN	NaN	NaN	NaN	NaN	NaN	15	21	33	31	39	42	42	46	63	41	52	50
VT	Vermont	NaN	NaN	NaN	NaN	NaN	NaN	NaN	NaN	NaN	6	7	9	10	15	9	13	NaN	NaN	NaN	13	16
VA	Virginia	NaN	NaN	NaN	NaN	NaN	NaN	NaN	NaN	NaN	98	98	132	141	143	127	109	119	159	190	192	203
WA	Washington	NaN	NaN	NaN	NaN	NaN	NaN	NaN	NaN	NaN	73	91	127	144	134	144	137	159	179	165	183	185
WV	West Virginia	NaN	NaN	NaN	NaN	NaN	NaN	NaN	NaN	NaN	16	9	13	14	13	NaN	17	25	NaN	21	NaN	NaN
WI	Wisconsin	NaN	NaN	NaN	NaN	NaN	NaN	NaN	NaN	NaN	258	272	265	287	283	275	278	261	250	326	300	322
WY	Wyoming	NaN	NaN	NaN	NaN	NaN	NaN	NaN	NaN	NaN	22	29	34	24	27	27	26	30	25	19	NaN	30

## Sheet: Age6
ST	State\Report Year	1991	1992	1993	1994	1995	1996	1997	1998	1999	2000	2001	2002	2003	2004	2005	2006	2007	2008	2009	2010	2011
AL	Alabama	117	75	84	85	97	92	81	108	116	101	95	98	127	106	101	103	97	130	137	178	147
AK	Alaska	11	20	10	24	19	29	30	32	34	44	26	10	14	20	19	33	30	35	37	44	49
AZ	Arizona	2	18	27	30	34	48	54	58	75	89	95	118	121	189	186	230	227	239	246	246	174
AR	Arkansas	13	31	48	78	88	93	106	116	125	136	118	138	142	184	161	159	164	160	159	221	215
CA	California	808	699	653	710	741	838	777	739	772	811	850	986	975	1110	1133	1179	1297	1314	1442	1628	1665
CO	Colorado	NaN	NaN	NaN	NaN	NaN	NaN	NaN	NaN	NaN	NaN	NaN	NaN	NaN	NaN	NaN	NaN	NaN	NaN	NaN	NaN	NaN
CT	Connecticut	46	64	95	169	170	197	239	244	244	274	272	297	264	297	305	281	350	351	372	410	443
DE	Delaware	NaN	NaN	NaN	NaN	NaN	NaN	NaN	NaN	NaN	NaN	NaN	NaN	NaN	NaN	41	58	55	48	52	46	69
DC	District of Columbia	NaN	1	NaN	8	18	15	21	15	12	19	11	16	9	22	23	32	15	NaN	32	46	NaN
FL	Florida	126	78	60	88	102	136	200	243	341	361	429	484	594	588	647	679	692	662	694	721	820
GA	Georgia	41	69	109	140	202	237	313	362	400	475	549	486	517	536	508	507	455	338	356	341	370
HI	Hawaii	20	15	20	28	40	34	44	60	95	95	56	77	67	87	80	80	74	91	65	78	77
ID	Idaho	15	12	23	39	36	37	25	21	30	31	30	30	36	36	45	47	41	52	62	66	76
IL	Illinois	46	62	70	183	248	261	289	365	420	439	452	560	703	765	871	955	919	592	609	629	591
IN	Indiana	NaN	12	33	71	70	93	115	116	137	167	202	222	257	280	273	328	386	368	431	460	510
IA	Iowa	NaN	NaN	NaN	NaN	NaN	NaN	3	1	3	3	8	11	12	13	14	NaN	NaN	NaN	NaN	NaN	NaN
KS	Kansas	56	52	63	84	102	142	150	146	158	181	160	176	173	182	162	122	110	125	113	126	153
KY	Kentucky	13	29	33	81	85	104	143	148	116	104	121	138	155	185	178	223	200	175	184	161	151
LA	Louisiana	141	119	170	220	255	299	320	270	282	233	185	192	216	222	157	159	146	147	167	132	160
ME	Maine	20	33	33	38	41	69	60	60	73	100	102	119	161	158	157	174	160	182	180	203	214
MD	Maryland	138	136	144	162	190	204	231	294	257	292	241	261	299	349	344	315	357	415	442	389	354
MA	Massachusetts	87	55	55	63	62	60	61	63	55	51	91	101	115	142	144	149	157	180	198	190	208
MI	Michigan	NaN	NaN	NaN	NaN	NaN	NaN	NaN	NaN	NaN	NaN	NaN	40	271	407	439	472	478	529	526	516	538
MN	Minnesota	61	92	128	191	213	176	198	203	172	165	176	170	164	136	147	178	167	197	200	191	200
MS	Mississippi	NaN	NaN	NaN	NaN	NaN	NaN	NaN	NaN	NaN	NaN	NaN	28	53	56	81	93	82	95	87	103	143
MO	Missouri	20	31	64	82	143	146	180	249	246	307	342	323	345	355	397	423	408	425	469	522	535
MT	Montana	NaN	13	13	16	13	28	22	28	21	28	18	20	25	34	32	33	32	29	30	41	41
NE	Nebraska	56	60	66	86	74	95	106	114	107	144	142	153	153	166	148	161	152	158	180	179	191
NV	Nevada	4	30	23	29	31	30	56	63	65	90	97	82	114	115	140	141	146	132	183	178	214
NH	New Hampshire	34	56	71	98	101	114	126	153	90	102	99	95	97	87	81	98	73	104	84	95	115
NJ	New Jersey	20	19	19	15	23	25	33	76	220	439	601	711	831	1011	1085	1143	1177	1150	1325	1296	1308
NM	New Mexico	11	51	57	64	58	90	80	60	95	63	51	60	69	65	66	63	53	82	84	115	139
NY	New York	394	385	607	829	1106	1365	1566	1769	1989	2277	2498	2738	3046	3376	3615	3828	2719	2963	3363	3423	3387
NC	North Carolina	105	145	185	235	326	319	320	392	415	397	304	294	298	291	324	376	326	298	292	272	310
ND	North Dakota	8	8	17	10	14	22	15	11	27	10	14	28	28	36	21	28	19	26	23	33	NaN
OH	Ohio	NaN	64	69	87	117	112	124	159	196	270	321	367	425	524	611	647	671	701	808	799	919
OK	Oklahoma	22	30	28	42	46	71	61	104	146	143	126	65	79	86	95	103	98	117	111	131	158
OR	Oregon	26	32	47	76	83	115	118	114	143	142	165	160	161	195	197	198	210	230	244	232	265
PA	Pennsylvania	5	18	10	23	37	30	33	39	62	109	126	237	302	343	440	447	515	549	708	847	918
RI	Rhode Island	10	31	36	41	43	55	83	76	76	96	98	124	143	118	98	101	105	53	39	35	34
SC	South Carolina	6	9	23	53	53	72	83	106	104	119	150	159	187	189	196	204	213	130	161	130	164
SD	South Dakota	9	11	16	11	20	12	11	11	17	15	27	32	52	49	38	53	54	62	64	71	64
TN	Tennessee	55	125	209	252	279	280	293	274	206	192	185	212	219	224	250	273	245	214	278	276	310
TX	Texas	754	695	874	1020	1193	1239	1282	1335	1425	1438	1459	1460	1628	1834	1757	1797	1709	1724	1776	1805	1795
UT	Utah	24	18	30	28	33	48	51	39	46	39	42	53	70	67	79	85	94	98	114	86	129
VT	Vermont	11	10	14	18	44	42	16	13	16	20	38	37	38	32	42	31	NaN	NaN	28	33	36
VA	Virginia	30	63	82	91	106	153	157	198	148	245	223	273	311	361	365	335	343	410	477	623	659
WA	Washington	334	420	581	702	752	751	633	611	536	320	271	302	346	368	339	340	338	370	360	371	388
WV	West Virginia	NaN	5	9	23	35	41	65	57	41	50	63	59	73	78	100	99	93	99	134	109	119
WI	Wisconsin	22	36	39	105	122	181	208	261	376	410	400	449	464	518	531	515	589	583	614	706	694
WY	Wyoming	22	26	28	22	37	34	39	30	30	34	40	34	42	45	52	58	45	55	41	NaN	55

## Sheet: Age7
ST	State\Report Year	1991	1992	1993	1994	1995	1996	1997	1998	1999	2000	2001	2002	2003	2004	2005	2006	2007	2008	2009	2010	2011
AL	Alabama	110	102	96	115	116	156	165	180	237	248	201	194	201	259	240	212	204	273	309	356	358
AK	Alaska	10	20	21	26	32	37	42	49	39	53	50	36	33	25	35	53	68	73	66	76	87
AZ	Arizona	13	23	41	38	61	54	80	77	101	130	146	173	221	236	297	317	383	369	421	408	391
AR	Arkansas	26	55	77	145	185	227	243	250	230	241	263	231	281	291	304	288	282	268	298	319	358
CA	California	1101	1120	1051	1013	1113	1078	1177	1239	1147	1163	1318	1321	1567	1604	1761	1758	1874	2045	2187	2303	2652
CO	Colorado	NaN	NaN	NaN	NaN	NaN	NaN	NaN	NaN	NaN	NaN	NaN	NaN	NaN	NaN	NaN	NaN	NaN	NaN	NaN	NaN	NaN
CT	Connecticut	34	86	130	229	290	300	333	361	356	374	370	423	444	448	473	438	492	520	522	556	607
DE	Delaware	2	NaN	NaN	NaN	NaN	NaN	NaN	NaN	NaN	NaN	NaN	NaN	NaN	NaN	82	78	105	98	80	89	88
DC	District of Columbia	NaN	NaN	NaN	16	11	18	13	22	9	16	25	19	19	35	26	38	23	NaN	50	61	NaN
FL	Florida	140	85	67	79	115	164	234	268	417	549	603	685	776	877	895	984	1057	996	992	1005	1030
GA	Georgia	58	97	154	239	343	467	503	644	678	754	904	1017	965	1102	1139	1085	975	771	667	693	715
HI	Hawaii	23	21	24	24	39	52	63	69	114	122	132	90	120	120	135	124	125	128	128	118	133
ID	Idaho	29	24	29	34	59	53	59	49	51	48	60	66	78	75	70	101	80	82	113	122	143
IL	Illinois	66	65	92	169	253	364	385	455	570	661	681	796	897	1068	1112	1317	1263	1204	939	1005	1069
IN	Indiana	NaN	23	45	72	94	99	126	159	191	215	258	364	360	421	462	436	509	583	610	678	726
IA	Iowa	NaN	NaN	NaN	NaN	2	2	1	3	8	3	8	24	21	24	22	NaN	NaN	NaN	5	NaN	NaN
KS	Kansas	50	72	105	141	179	209	242	228	224	257	264	254	268	254	262	257	196	185	224	210	233
KY	Kentucky	24	23	67	109	160	180	240	302	303	248	289	281	338	388	421	417	508	423	386	340	331
LA	Louisiana	166	157	228	293	369	405	445	472	392	418	376	350	361	385	334	300	260	257	254	259	239
ME	Maine	21	33	58	62	82	85	86	108	106	135	189	181	188	247	247	247	273	266	290	291	326
MD	Maryland	112	177	188	206	266	290	320	389	449	440	437	452	501	588	654	606	621	688	714	762	716
MA	Massachusetts	115	75	75	81	81	81	81	79	74	68	163	209	251	282	315	322	334	361	388	431	464
MI	Michigan	NaN	NaN	NaN	NaN	NaN	NaN	NaN	NaN	NaN	NaN	NaN	69	390	618	760	755	764	761	766	809	821
MN	Minnesota	78	132	178	218	310	317	336	361	347	378	373	378	416	425	456	482	506	518	569	613	630
MS	Mississippi	NaN	NaN	NaN	NaN	NaN	NaN	NaN	NaN	NaN	NaN	NaN	56	123	162	162	195	193	193	181	188	239
MO	Missouri	23	52	73	149	186	240	282	349	387	421	484	535	585	644	664	689	700	655	703	797	854
MT	Montana	17	10	17	24	26	38	29	34	35	27	47	30	41	49	46	52	51	54	41	44	54
NE	Nebraska	56	66	80	92	111	118	127	148	149	147	168	195	218	210	249	229	252	225	229	268	268
NV	Nevada	8	39	31	30	49	56	62	100	101	84	134	131	119	166	154	164	181	178	183	234	241
NH	New Hampshire	29	90	89	144	159	162	171	184	203	164	167	156	168	179	154	150	127	165	165	149	152
NJ	New Jersey	24	27	32	25	33	34	43	117	278	470	766	960	1125	1250	1511	1558	1676	1576	1694	1918	1824
NM	New Mexico	12	48	71	85	77	98	124	106	108	148	107	95	111	115	120	96	120	101	138	133	138
NY	New York	252	247	390	534	713	878	1008	1139	1280	1465	1609	1763	1961	2173	2327	2464	3346	3401	3763	3988	4032
NC	North Carolina	147	211	289	370	492	602	615	649	743	740	714	715	752	742	873	855	914	797	770	819	777
ND	North Dakota	4	11	15	26	19	22	29	24	25	31	25	47	47	58	51	40	29	38	44	40	59
OH	Ohio	NaN	88	84	126	157	144	163	205	263	342	446	537	629	760	861	959	1115	1060	1136	1212	1173
OK	Oklahoma	18	30	27	59	63	90	116	123	183	232	206	178	130	160	162	223	216	201	218	216	239
OR	Oregon	42	49	79	125	151	149	198	216	242	228	264	283	273	287	347	360	358	361	391	408	436
PA	Pennsylvania	3	8	19	25	51	39	61	74	99	167	223	298	438	591	673	798	836	910	1012	1279	1428
RI	Rhode Island	17	31	49	53	77	88	97	132	119	149	163	188	179	208	176	163	173	142	82	82	82
SC	South Carolina	14	19	40	75	116	130	164	166	206	217	239	262	306	315	343	323	347	366	301	323	318
SD	South Dakota	8	10	17	15	16	22	13	18	27	29	28	50	61	61	69	62	79	93	105	92	110
TN	Tennessee	112	192	360	485	520	486	504	459	420	366	358	366	397	428	417	445	482	441	444	524	560
TX	Texas	786	922	1151	1337	1654	1701	1843	1923	2082	2060	2150	2098	2331	2581	2657	2493	2423	2236	2298	2497	2486
UT	Utah	27	28	35	40	42	53	64	67	51	70	87	97	109	137	140	144	159	164	175	193	175
VT	Vermont	3	21	23	33	39	63	54	55	56	76	54	93	82	88	81	99	NaN	NaN	96	81	91
VA	Virginia	47	114	146	219	272	327	410	384	380	450	578	591	643	706	726	742	774	748	949	1263	1388
WA	Washington	544	566	760	969	988	995	968	943	1040	861	565	541	617	661	693	645	631	630	664	710	714
WV	West Virginia	NaN	11	26	46	62	67	97	116	110	89	104	131	149	140	160	187	198	168	180	197	217
WI	Wisconsin	32	32	49	104	122	193	260	314	387	561	546	571	609	705	758	739	734	818	884	887	979
WY	Wyoming	25	22	31	31	36	45	43	43	45	47	47	59	47	66	71	72	76	71	87	NaN	80

## Sheet: Age8
ST	State\Report Year	1991	1992	1993	1994	1995	1996	1997	1998	1999	2000	2001	2002	2003	2004	2005	2006	2007	2008	2009	2010	2011
AL	Alabama	94	100	105	127	153	189	220	284	275	332	367	333	311	354	402	336	338	378	495	543	537
AK	Alaska	12	25	19	29	29	32	41	57	55	68	43	57	38	40	48	84	90	122	112	113	123
AZ	Arizona	4	22	37	56	66	79	77	103	134	153	210	214	283	323	378	419	472	489	523	575	565
AR	Arkansas	25	58	116	165	251	297	375	363	379	381	410	404	365	436	458	473	441	451	474	488	523
CA	California	1156	1121	1200	1164	1250	1300	1336	1502	1476	1512	1715	1833	1947	2229	2385	2545	2616	2734	2934	3199	3377
CO	Colorado	NaN	NaN	NaN	NaN	NaN	NaN	NaN	NaN	NaN	NaN	NaN	NaN	NaN	NaN	NaN	NaN	NaN	NaN	NaN	NaN	NaN
CT	Connecticut	22	65	146	241	329	399	461	476	445	479	526	547	576	634	640	610	665	680	676	718	742
DE	Delaware	1	NaN	NaN	NaN	NaN	NaN	NaN	NaN	NaN	NaN	NaN	NaN	NaN	NaN	111	127	124	161	131	112	133
DC	District of Columbia	NaN	2	NaN	19	20	12	9	13	189	14	28	21	27	39	35	54	38	42	54	88	107
FL	Florida	136	97	58	96	137	178	288	341	455	634	841	885	1009	1125	1229	1298	1348	1402	1370	1368	1375
GA	Georgia	61	93	200	275	440	587	767	883	1024	1135	1200	1334	1521	1599	1724	1783	1675	1342	1164	1121	1246
HI	Hawaii	25	23	24	37	41	41	75	93	103	157	153	167	142	166	173	175	163	182	170	183	170
ID	Idaho	27	36	28	37	52	68	68	83	82	81	77	91	92	133	138	116	162	152	145	186	212
IL	Illinois	56	79	91	164	249	341	504	539	652	810	834	981	1150	1254	1493	1497	1658	1594	1589	1390	1530
IN	Indiana	NaN	20	52	104	113	141	154	179	254	305	356	440	546	573	603	660	682	773	862	881	980
IA	Iowa	NaN	NaN	NaN	NaN	1	3	4	4	5	9	8	22	40	40	33	31	27	6	6	6	6
KS	Kansas	55	71	114	148	238	270	314	320	309	352	335	378	345	358	338	362	359	321	274	328	349
KY	Kentucky	25	43	48	134	206	256	334	379	471	514	501	529	614	687	754	755	790	804	757	631	619
LA	Louisiana	165	196	267	353	428	544	565	601	601	552	587	562	553	545	511	539	443	428	422	380	441
ME	Maine	24	33	57	71	86	110	131	131	168	176	214	265	247	273	344	343	341	355	344	391	412
MD	Maryland	114	137	218	290	317	401	439	510	557	653	685	680	699	789	887	925	899	970	1003	1016	1104
MA	Massachusetts	136	87	87	94	95	94	97	97	89	84	225	305	337	444	463	549	538	552	600	694	733
MI	Michigan	NaN	NaN	NaN	NaN	NaN	NaN	NaN	NaN	NaN	NaN	NaN	78	497	842	992	1103	1051	1045	1101	1139	1144
MN	Minnesota	82	119	188	281	308	383	428	482	534	516	528	525	551	604	657	725	727	764	768	793	872
MS	Mississippi	NaN	NaN	NaN	NaN	NaN	NaN	NaN	NaN	NaN	NaN	NaN	81	185	273	320	330	366	340	349	364	384
MO	Missouri	34	34	96	172	252	296	384	461	491	551	631	773	850	884	930	930	997	990	946	1047	1090
MT	Montana	16	26	22	23	37	39	49	56	57	53	64	59	63	64	82	68	67	67	75	71	83
NE	Nebraska	46	61	71	117	126	145	168	178	202	200	182	266	262	278	250	326	304	338	295	320	369
NV	Nevada	7	31	36	40	45	64	68	89	129	118	120	191	179	166	197	187	195	217	217	247	304
NH	New Hampshire	40	70	134	156	184	211	215	224	242	266	230	247	266	240	259	227	253	263	227	252	231
NJ	New Jersey	29	33	39	29	34	43	41	105	432	628	881	1181	1446	1655	1737	2023	2081	2071	2200	2228	2402
NM	New Mexico	29	36	66	118	106	99	135	160	173	172	172	149	157	184	189	169	149	174	140	208	224
NY	New York	377	370	583	798	1065	1314	1508	1704	1915	2192	2405	2636	2932	3250	3481	3685	3750	3904	4178	4344	4555
NC	North Carolina	150	230	360	504	601	743	890	939	1036	1035	1189	1231	1343	1495	1612	1834	1798	1774	1663	1673	1889
ND	North Dakota	8	5	18	19	31	30	28	45	36	37	48	51	74	65	76	67	71	45	61	58	72
OH	Ohio	NaN	80	101	111	146	181	175	271	357	463	559	700	862	1047	1181	1345	1383	1590	1601	1663	1752
OK	Oklahoma	17	30	34	46	78	108	155	192	200	274	361	355	393	437	515	584	645	416	374	414	415
OR	Oregon	42	71	106	156	192	245	243	324	345	385	324	385	403	429	425	533	539	542	525	607	663
PA	Pennsylvania	8	8	15	30	58	61	76	101	131	192	292	388	510	705	941	1069	1142	1313	1375	1533	1865
RI	Rhode Island	25	19	40	69	68	97	131	142	163	182	206	227	244	234	249	233	224	205	171	131	122
SC	South Carolina	11	26	58	94	130	185	224	257	246	322	353	383	418	438	454	462	486	526	568	495	580
SD	South Dakota	5	9	14	18	16	20	27	24	29	39	54	56	73	79	77	98	102	114	111	135	133
TN	Tennessee	115	241	366	634	721	731	717	645	580	574	532	591	576	665	669	657	670	683	697	755	844
TX	Texas	911	949	1297	1620	1972	2246	2416	2663	2738	2815	2762	2934	3036	3416	3415	3492	3096	2920	2900	3022	3256
UT	Utah	42	33	35	40	54	51	61	77	86	75	115	142	159	187	215	231	235	258	256	305	340
VT	Vermont	11	12	33	48	57	62	76	86	96	99	103	96	113	124	139	129	NaN	NaN	136	146	129
VA	Virginia	61	131	245	322	499	606	681	751	657	938	964	1137	1129	1315	1333	1266	1313	1407	1440	1733	1835
WA	Washington	601	709	881	1134	1210	1177	1221	1220	1206	1269	1079	885	881	983	1032	1129	1040	1020	1067	1088	1152
WV	West Virginia	1	10	26	64	78	101	127	143	162	175	168	207	223	247	227	252	283	283	244	263	305
WI	Wisconsin	26	46	52	108	124	202	265	364	424	552	703	726	763	831	881	910	967	999	1061	1124	1159
WY	Wyoming	27	34	24	47	48	42	59	51	58	60	81	63	76	78	101	101	84	106	111	NaN	128

## Sheet: Age9
ST	State\Report Year	1991	1992	1993	1994	1995	1996	1997	1998	1999	2000	2001	2002	2003	2004	2005	2006	2007	2008	2009	2010	2011
AL	Alabama	77	85	87	120	154	191	233	277	347	387	445	475	491	443	489	513	453	503	612	760	772
AK	Alaska	13	23	8	22	33	28	43	59	71	84	52	61	86	69	77	120	148	166	184	158	184
AZ	Arizona	10	23	33	47	61	80	106	111	157	175	225	271	304	406	475	502	606	590	620	702	724
AR	Arkansas	22	55	100	192	251	354	398	512	496	538	526	528	550	505	585	570	593	602	641	615	653
CA	California	1239	1102	1120	1212	1267	1418	1459	1563	1617	1779	1985	2296	2481	2628	2991	3127	3310	3395	3651	3853	4359
CO	Colorado	NaN	NaN	NaN	NaN	NaN	NaN	NaN	NaN	NaN	NaN	NaN	NaN	NaN	NaN	NaN	NaN	NaN	NaN	NaN	NaN	NaN
CT	Connecticut	27	70	143	217	366	462	557	549	592	568	645	649	698	732	831	798	860	822	836	835	894
DE	Delaware	1	NaN	NaN	NaN	NaN	NaN	NaN	NaN	NaN	NaN	NaN	NaN	NaN	NaN	115	147	160	147	192	163	153
DC	District of Columbia	NaN	1	1	10	16	6	8	7	30	25	24	22	26	42	43	51	42	49	80	90	109
FL	Florida	125	83	54	96	125	174	307	396	534	701	953	1175	1257	1373	1507	1714	1728	1702	1739	1727	1772
GA	Georgia	76	105	183	320	449	712	821	1096	1226	1437	1492	1601	1809	2024	2140	2252	2203	1954	1790	1759	1863
HI	Hawaii	25	27	28	21	49	45	50	85	123	165	202	175	240	200	196	221	211	208	241	204	223
ID	Idaho	20	33	33	34	59	59	85	92	99	95	107	109	130	140	196	190	193	248	220	242	309
IL	Illinois	51	67	103	182	243	338	458	651	705	897	923	1180	1350	1520	1649	1841	1835	1953	1905	2017	2006
IN	Indiana	NaN	23	39	92	131	153	196	211	272	369	439	512	582	708	748	798	866	938	996	1086	1195
IA	Iowa	NaN	NaN	NaN	NaN	2	2	5	11	9	10	22	31	36	54	51	36	29	7	6	7	7
KS	Kansas	54	67	112	162	231	308	344	369	375	417	440	415	472	446	494	476	475	504	476	418	451
KY	Kentucky	25	32	60	120	233	362	410	525	661	729	859	889	992	1174	1262	1347	1438	1386	1334	1229	1114
LA	Louisiana	187	201	307	379	457	546	649	698	702	734	754	791	806	786	723	752	819	756	723	689	717
ME	Maine	24	29	55	77	111	110	132	157	177	219	234	301	326	325	364	414	401	414	414	405	444
MD	Maryland	107	135	200	298	402	451	547	581	699	758	851	935	958	1005	1065	1071	1159	1245	1227	1230	1290
MA	Massachusetts	143	93	91	102	101	102	104	109	104	95	261	367	470	507	641	702	795	776	887	996	1033
MI	Michigan	NaN	NaN	NaN	NaN	NaN	NaN	NaN	NaN	NaN	NaN	NaN	98	592	989	1218	1284	1341	1326	1324	1389	1402
MN	Minnesota	91	107	175	283	357	396	477	542	606	683	712	671	715	727	845	917	932	948	1017	971	1031
MS	Mississippi	NaN	NaN	NaN	NaN	NaN	NaN	NaN	NaN	NaN	NaN	NaN	115	229	304	408	464	498	510	491	535	584
MO	Missouri	38	53	83	196	273	360	399	542	620	661	778	845	1007	1107	1122	1215	1241	1214	1280	1254	1313
MT	Montana	16	30	24	35	43	42	51	64	87	83	87	89	90	98	81	122	93	106	102	93	104
NE	Nebraska	53	55	64	69	140	142	159	203	177	224	238	253	317	358	318	343	437	370	415	400	432
NV	Nevada	8	35	31	37	39	68	90	94	130	146	148	141	236	227	217	229	221	234	273	282	325
NH	New Hampshire	59	69	114	168	215	235	265	260	283	301	332	289	337	371	319	364	306	334	335	299	336
NJ	New Jersey	35	27	42	48	43	38	53	119	392	708	1018	1270	1595	1877	2144	2255	2536	2437	2734	2799	2734
NM	New Mexico	19	41	55	98	135	128	127	158	203	209	211	221	223	227	254	235	219	220	235	230	309
NY	New York	382	375	590	904	1205	1489	1706	1929	2168	2480	2723	2984	3320	3680	3941	4173	4283	4389	4664	4603	4780
NC	North Carolina	161	232	338	506	715	839	1023	1246	1392	1392	1651	1758	1820	1890	2113	2212	2467	2349	2320	2309	2303
ND	North Dakota	9	16	11	18	23	37	33	37	57	58	51	70	72	116	98	94	93	106	96	115	101
OH	Ohio	NaN	85	84	106	147	180	213	269	407	549	698	863	1017	1231	1505	1633	1776	1812	2133	2163	2217
OK	Oklahoma	18	21	43	47	70	114	170	227	273	288	397	472	487	558	612	672	809	861	942	1136	1181
OR	Oregon	55	61	105	156	221	228	318	335	451	439	495	420	477	531	559	590	682	687	706	739	790
PA	Pennsylvania	5	8	16	25	56	68	81	110	152	222	309	482	605	806	1023	1317	1391	1535	1764	1888	2015
RI	Rhode Island	13	26	28	59	89	97	134	185	184	248	254	279	287	307	274	288	281	262	232	209	191
SC	South Carolina	8	17	59	111	136	183	222	273	313	362	425	489	526	545	576	592	615	698	697	756	724
SD	South Dakota	8	8	16	18	13	12	29	39	51	45	50	75	91	94	96	97	129	126	143	149	157
TN	Tennessee	139	235	398	559	836	858	831	755	747	733	745	772	804	808	834	852	888	824	951	1024	1095
TX	Texas	869	1028	1243	1737	2141	2532	2968	3101	3399	3498	3702	3773	4141	4566	4454	4318	4173	3591	3670	3635	3865
UT	Utah	27	42	46	48	55	64	62	76	97	108	103	168	188	219	245	282	313	296	322	351	402
VT	Vermont	10	13	24	50	70	69	80	95	110	129	114	129	120	134	146	169	NaN	NaN	156	164	177
VA	Virginia	67	111	202	368	511	703	876	1009	1006	1234	1545	1681	1837	1847	2024	1995	1957	2037	2128	2091	2255
WA	Washington	668	752	1002	1236	1394	1359	1378	1439	1472	1465	1486	1393	1399	1457	1554	1628	1732	1704	1657	1706	1741
WV	West Virginia	1	11	23	57	98	119	146	176	223	226	259	248	276	299	304	313	341	365	361	306	366
WI	Wisconsin	16	36	50	89	141	193	250	379	504	609	676	841	900	933	1046	1064	1100	1143	1242	1280	1366
WY	Wyoming	17	30	34	44	58	50	67	69	72	82	76	102	80	93	92	139	131	119	150	NaN	164

## Sheet: Age10
ST	State\Report Year	1991	1992	1993	1994	1995	1996	1997	1998	1999	2000	2001	2002	2003	2004	2005	2006	2007	2008	2009	2010	2011
AL	Alabama	83	74	81	97	135	179	236	307	342	445	460	538	574	596	532	521	548	595	660	789	863
AK	Alaska	9	28	15	19	23	41	30	59	71	86	59	68	65	100	87	147	147	186	199	210	203
AZ	Arizona	8	20	36	45	63	83	102	118	164	193	219	310	365	434	538	572	703	696	722	768	841
AR	Arkansas	36	65	112	195	287	338	437	476	584	674	666	629	655	700	631	663	698	697	764	768	726
CA	California	1100	1108	1063	1071	1217	1295	1438	1575	1757	1941	2151	2457	2874	3092	3347	3626	3826	4016	4179	4527	4836
CO	Colorado	NaN	NaN	NaN	NaN	NaN	NaN	NaN	NaN	NaN	NaN	NaN	NaN	NaN	NaN	NaN	NaN	NaN	NaN	NaN	NaN	NaN
CT	Connecticut	27	47	128	227	339	465	579	664	606	747	702	758	789	816	909	944	971	931	938	945	963
DE	Delaware	NaN	NaN	NaN	NaN	NaN	NaN	NaN	NaN	NaN	NaN	NaN	NaN	NaN	NaN	161	163	175	169	176	212	202
DC	District of Columbia	NaN	1	NaN	11	8	11	10	4	4	13	24	30	26	42	47	50	48	51	65	102	119
FL	Florida	160	84	53	94	132	196	283	432	553	815	1065	1330	1551	1666	1796	1896	2016	2049	2039	2068	2100
GA	Georgia	65	105	174	311	458	637	932	1096	1416	1522	1765	1839	2006	2156	2493	2531	2549	2370	2259	2147	2216
HI	Hawaii	21	25	23	36	31	57	58	62	128	151	186	256	237	282	232	212	237	219	227	253	218
ID	Idaho	32	24	30	42	50	66	87	101	117	126	133	143	158	198	173	224	233	256	309	295	333
IL	Illinois	54	79	79	176	242	326	470	609	820	940	968	1318	1498	1725	1874	2008	2147	2097	2214	2223	2402
IN	Indiana	NaN	11	53	94	106	157	178	242	257	362	497	554	670	743	861	899	985	1075	1113	1193	1311
IA	Iowa	NaN	NaN	NaN	NaN	NaN	3	2	2	18	11	21	39	47	54	67	45	38	7	6	7	7
KS	Kansas	49	57	83	188	223	299	395	395	439	476	490	533	533	578	586	625	608	595	614	630	567
KY	Kentucky	26	34	47	112	212	333	519	579	671	859	989	1070	1141	1250	1440	1508	1612	1603	1535	1404	1322
LA	Louisiana	185	223	295	373	473	560	631	733	823	821	856	945	965	976	846	903	872	939	885	813	807
ME	Maine	24	33	44	68	88	142	140	168	193	228	306	305	379	382	384	436	485	446	442	467	444
MD	Maryland	117	139	162	253	360	491	520	644	692	857	936	1055	1179	1183	1200	1259	1265	1463	1476	1463	1443
MA	Massachusetts	142	91	92	99	102	103	107	110	111	107	282	400	543	682	720	870	910	1056	1089	1202	1348
MI	Michigan	NaN	NaN	NaN	NaN	NaN	NaN	NaN	NaN	NaN	NaN	NaN	122	729	1080	1381	1496	1545	1507	1534	1586	1633
MN	Minnesota	71	126	170	249	365	437	488	608	696	755	805	861	870	932	930	1054	1139	1161	1171	1230	1209
MS	Mississippi	NaN	NaN	NaN	NaN	NaN	NaN	NaN	NaN	NaN	NaN	NaN	118	282	302	397	501	543	570	602	644	723
MO	Missouri	36	59	89	182	280	347	449	584	688	809	903	984	1012	1260	1390	1395	1472	1463	1468	1553	1527
MT	Montana	13	26	32	31	43	57	70	87	82	102	106	105	117	113	126	112	143	121	129	138	118
NE	Nebraska	54	72	68	81	96	149	147	173	213	214	263	319	320	388	398	388	408	497	409	480	442
NV	Nevada	4	25	36	36	55	60	77	122	121	162	181	172	198	270	237	230	260	251	266	316	321
NH	New Hampshire	61	85	114	169	205	248	274	307	295	323	341	359	336	380	401	382	387	401	411	411	372
NJ	New Jersey	35	33	23	46	42	54	44	127	412	709	1053	1360	1650	1990	2307	2546	2623	2655	2945	3148	3205
NM	New Mexico	10	34	58	85	92	156	145	136	184	222	248	253	278	294	269	306	265	256	278	293	293
NY	New York	357	350	551	832	1110	1370	1572	1777	1997	2286	2508	2749	3057	3390	3630	3843	4397	4569	4874	4969	4957
NC	North Carolina	178	239	350	520	686	966	1078	1332	1574	1574	1919	2134	2225	2289	2411	2631	2719	2933	2754	2822	2846
ND	North Dakota	3	14	19	20	21	30	30	42	54	69	72	81	93	109	136	114	135	138	118	135	144
OH	Ohio	NaN	83	122	114	143	185	248	321	401	646	809	1085	1300	1430	1692	1928	2106	2182	2313	2635	2678
OK	Oklahoma	16	27	36	54	70	109	173	239	299	399	365	516	599	671	687	768	834	915	1108	1233	1394
OR	Oregon	62	69	89	169	202	259	274	380	429	511	548	600	499	588	631	684	682	822	826	833	868
PA	Pennsylvania	3	8	20	27	44	73	101	121	159	240	333	516	714	879	1139	1318	1597	1738	1906	2166	2311
RI	Rhode Island	21	20	37	53	72	112	141	168	213	231	312	331	337	339	353	331	340	328	281	259	249
SC	South Carolina	15	10	54	97	174	172	251	273	324	401	438	520	640	648	658	644	706	763	855	866	963
SD	South Dakota	5	14	9	19	21	20	30	31	47	68	70	75	98	111	113	132	115	149	169	159	157
TN	Tennessee	132	253	382	578	779	907	942	909	871	846	877	955	937	1059	1010	1031	1051	999	991	1146	1302
TX	Texas	854	1011	1314	1609	2233	2537	3110	3520	3728	4018	4298	4532	4856	5532	5497	5235	4858	4561	4134	4367	4335
UT	Utah	36	36	45	43	53	67	64	84	86	116	143	163	229	256	269	301	355	363	369	403	425
VT	Vermont	12	11	25	40	60	77	80	98	116	104	163	149	147	150	156	165	NaN	NaN	186	175	182
VA	Virginia	61	109	169	330	519	701	946	1136	1174	1553	1659	2068	2063	2270	2195	2316	2312	2221	2294	2425	2436
WA	Washington	662	757	958	1262	1408	1451	1484	1528	1646	1747	1661	1729	1697	1724	1789	1870	1898	1986	1939	1934	2020
WV	West Virginia	1	5	23	53	91	126	159	198	227	286	284	346	340	379	366	404	398	424	456	427	400
WI	Wisconsin	22	38	51	101	104	194	252	329	517	646	733	781	998	1078	1117	1228	1229	1293	1352	1424	1473
WY	Wyoming	19	30	33	38	45	69	57	73	85	76	98	99	129	114	110	125	159	163	168	NaN	172

## Sheet: Age11
ST	State\Report Year	1991	1992	1993	1994	1995	1996	1997	1998	1999	2000	2001	2002	2003	2004	2005	2006	2007	2008	2009	2010	2011
AL	Alabama	69	77	80	87	130	162	226	300	364	413	505	549	593	647	662	562	538	587	693	800	857
AK	Alaska	11	15	17	25	32	29	45	40	71	105	61	70	66	89	95	168	169	181	200	219	226
AZ	Arizona	6	23	29	44	60	79	105	124	148	194	226	289	400	496	569	630	758	731	790	795	860
AR	Arkansas	32	63	120	181	262	371	409	495	605	701	762	761	742	754	775	706	728	764	783	814	846
CA	California	907	918	992	929	977	1133	1235	1372	1596	1957	2300	2575	2915	3258	3589	3862	4167	4323	4584	4776	5237
CO	Colorado	NaN	NaN	NaN	NaN	NaN	NaN	NaN	NaN	NaN	NaN	NaN	NaN	NaN	NaN	NaN	NaN	NaN	NaN	NaN	NaN	NaN
CT	Connecticut	31	54	106	212	324	429	554	675	738	753	861	831	856	907	954	964	1005	1028	989	1043	1041
DE	Delaware	NaN	NaN	NaN	NaN	NaN	NaN	NaN	NaN	NaN	NaN	NaN	NaN	NaN	NaN	163	184	190	205	183	176	217
DC	District of Columbia	NaN	NaN	1	13	7	7	4	8	384	22	20	20	31	46	44	47	54	55	62	87	116
FL	Florida	150	65	74	95	125	185	330	395	553	797	1107	1296	1631	1863	1964	2019	2121	2204	2262	2256	2293
GA	Georgia	77	92	165	269	413	626	831	1116	1284	1664	1791	2022	2180	2373	2575	2775	2724	2665	2541	2486	2412
HI	Hawaii	19	13	26	28	39	31	55	70	81	143	163	216	272	259	292	249	237	252	229	232	265
ID	Idaho	30	33	27	46	61	65	78	107	126	129	157	172	174	200	224	217	274	262	308	341	372
IL	Illinois	48	60	88	163	211	347	401	567	740	1038	1069	1432	1627	1842	2004	2184	2233	2287	2313	2433	2456
IN	Indiana	NaN	20	46	77	124	144	182	211	298	383	474	587	707	785	862	967	1049	1093	1209	1228	1315
IA	Iowa	NaN	NaN	NaN	1	4	3	2	5	5	23	20	45	57	53	62	54	46	7	7	7	7
KS	Kansas	49	57	86	159	239	295	356	445	448	538	541	561	607	610	614	665	682	643	653	647	654
KY	Kentucky	23	28	48	75	172	285	425	595	707	835	989	1129	1213	1388	1482	1548	1662	1687	1655	1495	1366
LA	Louisiana	188	233	306	360	451	545	631	674	816	913	931	983	1002	1079	996	933	936	932	1021	920	893
ME	Maine	26	34	49	65	88	117	148	166	209	263	306	352	370	414	444	463	484	505	503	486	504
MD	Maryland	92	131	152	199	306	457	548	612	764	821	953	1115	1230	1289	1327	1289	1383	1428	1584	1609	1593
MA	Massachusetts	137	88	87	97	98	101	103	109	110	110	291	398	524	685	819	869	1019	1005	1227	1326	1444
MI	Michigan	NaN	NaN	NaN	NaN	NaN	NaN	NaN	NaN	NaN	NaN	NaN	116	714	1283	1466	1648	1646	1737	1694	1732	1732
MN	Minnesota	80	114	187	239	340	445	485	579	709	835	902	950	1015	1047	1171	1105	1266	1305	1371	1331	1391
MS	Mississippi	NaN	NaN	NaN	NaN	NaN	NaN	NaN	NaN	NaN	NaN	NaN	134	279	373	391	491	579	591	632	718	763
MO	Missouri	38	43	105	161	253	359	447	546	661	822	989	1066	1127	1203	1473	1528	1635	1642	1658	1690	1768
MT	Montana	17	17	21	34	37	59	60	86	117	100	129	125	140	152	138	144	135	157	160	162	155
NE	Nebraska	45	63	77	90	106	109	176	183	195	244	277	319	390	397	448	462	479	465	543	465	524
NV	Nevada	10	26	36	38	41	69	84	109	131	144	166	204	213	234	300	270	265	257	277	302	356
NH	New Hampshire	41	82	102	144	208	220	279	297	367	330	351	393	406	398	416	437	438	475	432	451	467
NJ	New Jersey	30	37	32	32	55	46	60	126	399	716	1057	1351	1677	2011	2359	2606	2862	2793	3120	3302	3407
NM	New Mexico	19	25	47	84	77	113	168	165	165	224	252	274	306	318	308	283	309	295	295	292	308
NY	New York	378	371	585	854	1139	1406	1614	1822	2050	2347	2574	2821	3138	3479	3725	3944	4460	4654	4977	5033	5244
NC	North Carolina	187	219	339	482	677	861	1146	1282	1561	1561	2113	2274	2463	2459	2607	2739	2968	2979	3123	3036	3164
ND	North Dakota	5	6	13	20	23	28	31	43	47	64	86	104	102	113	129	143	129	158	169	135	157
OH	Ohio	NaN	87	92	144	155	177	228	327	439	590	856	1157	1388	1625	1866	2054	2284	2404	2554	2630	3048
OK	Oklahoma	27	26	29	46	73	91	154	230	309	370	469	456	632	725	799	798	888	983	1072	1286	1423
OR	Oregon	52	78	87	141	215	231	313	347	428	479	634	624	631	622	685	729	774	810	915	930	926
PA	Pennsylvania	1	9	14	26	41	52	93	133	146	234	336	506	703	948	1158	1434	1570	1901	2018	2245	2505
RI	Rhode Island	16	26	24	43	67	92	143	179	209	271	279	364	380	375	364	379	378	366	326	313	280
SC	South Carolina	9	16	32	80	146	198	213	278	320	399	449	546	665	748	727	705	783	791	870	992	993
SD	South Dakota	4	7	15	14	12	19	24	36	48	64	82	95	105	114	118	142	139	152	149	163	166
TN	Tennessee	161	210	371	538	728	886	914	949	930	909	954	1036	1065	1118	1148	1136	1109	1136	1089	1138	1309
TX	Texas	905	992	1234	1594	1972	2603	3000	3412	3803	3928	4406	4750	5129	5713	6132	6026	5564	5054	4757	4533	4802
UT	Utah	46	35	46	55	61	54	72	79	97	101	149	198	189	276	291	309	353	399	429	446	493
VT	Vermont	21	12	19	37	53	70	98	101	104	131	137	181	181	186	178	181	NaN	NaN	205	182	191
VA	Virginia	44	86	156	254	474	690	903	1126	1191	1632	1797	2141	2292	2419	2505	2426	2525	2498	2387	2452	2635
WA	Washington	597	773	968	1223	1417	1462	1550	1619	1685	1834	1891	1794	1921	1895	1943	1951	2013	2090	2155	2152	2169
WV	West Virginia	2	9	24	47	76	115	143	195	231	271	346	345	413	388	436	442	466	437	466	481	499
WI	Wisconsin	21	36	47	83	138	176	243	331	430	648	771	839	948	1171	1206	1242	1369	1365	1461	1480	1573
WY	Wyoming	28	25	37	42	42	51	61	71	88	101	89	106	128	163	146	127	128	182	185	NaN	196

## Sheet: Age12
ST	State\Report Year	1991	1992	1993	1994	1995	1996	1997	1998	1999	2000	2001	2002	2003	2004	2005	2006	2007	2008	2009	2010	2011
AL	Alabama	83	78	88	93	107	168	230	263	334	457	468	555	643	643	706	657	599	596	642	762	840
AK	Alaska	8	11	6	46	30	32	43	69	61	100	74	79	90	98	103	174	194	173	192	210	232
AZ	Arizona	10	18	31	39	66	60	88	134	160	166	229	269	354	480	603	673	766	753	787	895	869
AR	Arkansas	28	51	103	189	230	300	411	455	560	590	780	792	830	778	831	803	747	775	801	818	888
CA	California	796	779	825	852	955	993	1180	1320	1465	1842	2193	2730	2940	3261	3747	3977	4322	4553	4827	5053	5376
CO	Colorado	NaN	NaN	NaN	NaN	NaN	NaN	NaN	NaN	NaN	NaN	NaN	NaN	NaN	NaN	NaN	NaN	NaN	NaN	NaN	NaN	NaN
CT	Connecticut	23	58	100	174	277	411	537	597	758	833	854	963	940	940	1047	1056	1040	1054	1104	1042	1103
DE	Delaware	2	NaN	NaN	NaN	NaN	NaN	NaN	NaN	NaN	NaN	NaN	NaN	NaN	NaN	199	173	194	182	208	188	190
DC	District of Columbia	3	NaN	NaN	12	11	6	5	5	12	6	17	16	30	37	42	37	44	55	85	80	NaN
FL	Florida	181	119	78	123	153	162	299	437	482	742	988	1320	1549	1809	2089	2163	2179	2197	2268	2389	2386
GA	Georgia	69	101	133	235	385	519	785	962	1243	1454	1847	2053	2230	2418	2568	2706	2828	2729	2713	2659	2639
HI	Hawaii	23	18	17	30	31	41	41	72	84	102	150	203	246	281	251	283	244	261	263	228	248
ID	Idaho	15	26	40	37	57	81	84	107	134	125	144	176	191	199	220	248	235	267	303	323	381
IL	Illinois	55	68	92	145	205	323	450	530	685	940	968	1429	1709	1882	2097	2327	2434	2395	2427	2501	2662
IN	Indiana	NaN	27	44	70	96	153	174	214	257	382	468	584	719	837	911	962	1116	1155	1215	1288	1352
IA	Iowa	NaN	NaN	NaN	1	NaN	6	4	3	10	14	27	40	56	74	58	51	50	7	7	NaN	8
KS	Kansas	47	67	78	136	199	295	377	399	454	537	613	618	636	659	648	663	679	699	665	671	670
KY	Kentucky	28	28	43	72	111	234	338	540	713	791	938	1110	1232	1354	1450	1557	1602	1659	1644	1574	1400
LA	Louisiana	168	198	280	372	411	486	583	679	722	871	949	1003	1072	1066	1006	1022	946	960	964	1048	969
ME	Maine	20	38	44	62	79	89	137	177	195	262	336	366	406	414	447	489	509	508	537	508	523
MD	Maryland	80	100	152	193	277	360	533	587	651	819	925	1059	1252	1342	1403	1399	1373	1488	1518	1639	1648
MA	Massachusetts	133	80	80	86	89	90	95	99	99	101	291	428	582	686	849	963	1008	1149	1210	1396	1512
MI	Michigan	NaN	NaN	NaN	NaN	NaN	NaN	NaN	NaN	NaN	NaN	NaN	118	763	1263	1694	1679	1800	1805	1890	1812	1871
MN	Minnesota	75	105	156	247	302	413	524	559	666	816	900	1001	1116	1140	1186	1372	1298	1432	1441	1498	1524
MS	Mississippi	NaN	NaN	NaN	NaN	NaN	NaN	NaN	NaN	NaN	NaN	NaN	140	285	368	439	472	574	623	617	715	815
MO	Missouri	30	60	99	171	221	322	445	587	628	794	921	1085	1221	1324	1436	1641	1664	1773	1789	1792	1836
MT	Montana	15	30	26	42	47	60	60	90	109	150	139	148	173	174	169	150	171	161	172	161	174
NE	Nebraska	46	49	73	101	106	121	124	175	180	228	303	341	366	446	435	519	517	510	495	539	499
NV	Nevada	8	39	30	28	43	47	73	92	129	154	162	198	232	260	253	310	295	283	277	273	309
NH	New Hampshire	43	59	106	120	182	212	242	310	324	407	385	384	415	458	441	429	466	444	494	477	486
NJ	New Jersey	41	29	36	41	53	66	49	119	369	591	1078	1327	1680	1925	2260	2549	2909	2815	3228	3428	3456
NM	New Mexico	13	37	43	64	94	92	128	171	184	200	234	286	299	335	369	299	285	327	317	334	296
NY	New York	193	165	240	386	536	684	845	1029	1229	1481	1728	2024	2322	2583	2830	3046	4544	4719	5021	5122	5293
NC	North Carolina	187	214	290	442	584	790	972	1266	1432	1432	2027	2361	2513	2565	2710	2830	2907	3135	3186	3334	3223
ND	North Dakota	5	9	9	23	23	25	35	44	54	57	73	104	123	123	134	154	147	148	169	173	NaN
OH	Ohio	NaN	100	124	138	197	225	238	317	463	593	782	1134	1472	1665	1972	2174	2370	2504	2649	2858	2950
OK	Oklahoma	23	32	33	41	55	112	141	222	263	361	437	536	531	747	835	855	875	995	1134	1225	1402
OR	Oregon	69	78	104	138	188	233	285	357	394	480	545	679	675	690	684	736	788	875	869	976	1017
PA	Pennsylvania	3	4	15	19	34	45	67	112	173	204	318	482	688	935	1205	1374	1688	1786	2124	2317	2527
RI	Rhode Island	14	23	32	39	65	95	111	170	209	257	330	349	402	425	409	402	402	399	380	329	331
SC	South Carolina	11	16	32	54	104	152	217	237	286	391	461	536	658	747	788	777	794	854	882	950	1068
SD	South Dakota	7	3	9	20	21	17	23	33	38	57	85	105	128	120	117	128	143	153	152	162	168
TN	Tennessee	140	229	294	523	665	816	910	910	918	993	965	1097	1169	1187	1163	1221	1184	1133	1186	1207	1270
TX	Texas	901	994	1205	1503	1888	2195	2876	3251	3626	3817	4128	4617	5053	5616	5927	6139	5884	5421	4944	4794	4739
UT	Utah	32	33	50	47	56	61	69	90	96	104	133	200	251	232	300	348	350	382	419	504	504
VT	Vermont	10	21	19	33	38	55	89	105	120	113	149	139	183	190	215	197	NaN	NaN	204	194	183
VA	Virginia	63	100	147	260	354	634	834	1002	1215	1514	1833	2178	2336	2615	2590	2649	2558	2631	2593	2521	2621
WA	Washington	570	711	909	1154	1325	1460	1526	1628	1679	1738	1907	2049	1978	2076	2027	2023	2055	2102	2154	2243	2218
WV	West Virginia	NaN	6	18	46	71	106	137	174	230	257	313	392	413	459	439	478	490	494	460	479	530
WI	Wisconsin	22	35	40	76	113	188	234	297	420	554	759	889	973	1109	1303	1302	1332	1517	1522	1574	1609
WY	Wyoming	22	28	26	46	52	51	56	69	76	97	104	116	130	140	169	159	147	150	190	NaN	194

## Sheet: Age13
ST	State\Report Year	1991	1992	1993	1994	1995	1996	1997	1998	1999	2000	2001	2002	2003	2004	2005	2006	2007	2008	2009	2010	2011
AL	Alabama	51	84	84	97	107	144	217	261	314	379	480	537	620	658	657	673	645	634	625	726	769
AK	Alaska	16	12	13	43	32	28	37	58	84	77	70	90	94	93	91	189	181	193	181	207	214
AZ	Arizona	10	16	32	53	53	71	79	102	165	156	219	300	334	443	558	665	778	766	761	846	920
AR	Arkansas	20	50	95	137	221	247	328	472	508	578	627	781	849	860	847	829	810	758	830	843	855
CA	California	775	823	760	786	934	1030	1132	1321	1377	1671	2110	2499	3123	3314	3694	4062	4370	4772	4852	5239	5541
CO	Colorado	NaN	NaN	NaN	NaN	NaN	NaN	NaN	NaN	NaN	NaN	NaN	NaN	NaN	NaN	NaN	NaN	NaN	NaN	NaN	NaN	NaN
CT	Connecticut	30	58	100	153	224	355	514	630	642	838	907	944	1072	1072	1038	1143	1158	1078	1107	1139	1101
DE	Delaware	1	NaN	NaN	NaN	NaN	NaN	NaN	NaN	NaN	NaN	NaN	NaN	NaN	NaN	182	221	204	204	194	206	198
DC	District of Columbia	NaN	NaN	2	8	9	7	5	2	8	12	7	18	24	35	36	46	45	39	49	87	NaN
FL	Florida	236	123	109	143	166	198	332	396	554	690	941	1189	1558	1719	1965	2138	2270	2308	2295	2382	2468
GA	Georgia	48	86	149	206	325	482	616	856	1102	1414	1583	2030	2259	2433	2605	2630	2722	2817	2710	2712	2737
HI	Hawaii	10	21	17	12	27	38	42	49	85	107	106	187	227	270	280	244	275	241	276	268	243
ID	Idaho	40	24	29	49	45	65	83	91	120	151	132	158	196	204	231	242	247	257	308	323	345
IL	Illinois	61	80	103	218	229	279	402	553	682	845	870	1450	1743	1964	2112	2367	2501	2578	2526	2599	2741
IN	Indiana	NaN	16	53	85	109	121	161	205	260	325	457	580	682	805	938	992	1041	1174	1220	1267	1405
IA	Iowa	NaN	NaN	NaN	NaN	1	1	4	4	7	7	24	45	49	64	91	53	48	7	7	NaN	NaN
KS	Kansas	42	58	74	117	164	239	345	404	439	576	593	694	674	701	711	695	680	722	748	679	692
KY	Kentucky	24	24	33	63	105	163	297	420	615	793	871	1015	1166	1324	1411	1482	1585	1634	1642	1549	1517
LA	Louisiana	143	161	253	337	423	463	531	621	698	766	882	981	1033	1100	950	1028	1041	947	975	971	1068
ME	Maine	24	36	49	61	84	108	107	157	210	258	316	395	430	434	462	500	534	532	515	545	530
MD	Maryland	90	98	116	169	240	324	411	595	618	722	912	1017	1174	1349	1413	1446	1397	1477	1492	1523	1617
MA	Massachusetts	126	79	79	86	85	87	90	97	96	98	267	401	606	717	809	1014	1129	1181	1320	1399	1646
MI	Michigan	NaN	NaN	NaN	NaN	NaN	NaN	NaN	NaN	NaN	NaN	NaN	122	808	1266	1605	1862	1818	1887	1948	1980	1956
MN	Minnesota	49	90	161	231	306	381	508	638	651	784	919	1016	1150	1243	1310	1349	1526	1458	1592	1619	1596
MS	Mississippi	NaN	NaN	NaN	NaN	NaN	NaN	NaN	NaN	NaN	NaN	NaN	125	268	355	425	495	527	598	618	659	766
MO	Missouri	36	50	89	152	229	285	392	516	642	739	842	1050	1225	1322	1469	1546	1805	1781	1853	1893	1889
MT	Montana	14	30	33	50	63	67	69	85	115	136	174	151	174	191	190	184	188	206	194	180	196
NE	Nebraska	57	48	71	78	100	128	130	143	199	223	269	330	379	414	481	467	539	514	535	510	538
NV	Nevada	13	46	50	34	39	65	58	82	106	126	171	191	239	248	263	262	316	291	286	280	291
NH	New Hampshire	33	57	86	143	164	210	229	260	354	361	424	426	445	441	463	472	532	463	482	492	504
NJ	New Jersey	39	36	45	45	51	58	64	105	306	616	882	1337	1574	1942	2104	2459	2805	2804	3184	3495	3585
NM	New Mexico	15	27	52	51	61	100	98	132	170	198	228	256	311	325	350	344	306	277	339	324	334
NY	New York	244	209	304	457	635	810	1000	1218	1455	1753	2046	2396	2748	3057	3350	3605	4663	4733	4992	5119	5265
NC	North Carolina	159	201	306	389	564	692	876	1019	1401	1401	1871	2153	2516	2644	2741	2860	2984	2986	3192	3209	3381
ND	North Dakota	6	10	13	11	26	25	32	46	53	66	83	100	104	131	129	150	148	152	164	176	178
OH	Ohio	NaN	122	148	151	180	258	282	302	428	624	813	1067	1432	1721	1946	2170	2365	2561	2725	2897	3080
OK	Oklahoma	14	30	40	45	61	86	142	163	267	328	399	493	606	627	815	866	911	934	1044	1185	1313
OR	Oregon	67	81	102	136	196	233	284	343	424	436	542	624	715	748	767	779	834	860	929	941	1049
PA	Pennsylvania	5	7	10	14	38	60	73	82	137	236	278	478	680	890	1164	1422	1578	1925	1987	2350	2586
RI	Rhode Island	9	19	35	62	61	85	129	131	212	247	293	388	369	461	465	439	438	426	409	373	373
SC	South Carolina	6	13	31	41	81	140	177	224	269	331	442	519	633	739	769	828	858	854	941	967	1018
SD	South Dakota	5	7	5	10	33	19	23	32	55	52	73	104	132	142	132	135	138	147	163	162	165
TN	Tennessee	170	217	319	423	658	736	848	910	877	929	974	1057	1148	1229	1198	1189	1266	1166	1148	1204	1263
TX	Texas	850	987	1176	1416	1765	2095	2486	3035	3303	3528	3924	4178	4772	5272	5548	5823	5883	5636	5173	4844	4675
UT	Utah	45	34	48	51	62	60	64	84	106	130	110	168	243	279	271	343	368	368	393	462	523
VT	Vermont	9	12	17	31	39	47	74	97	123	113	139	165	155	200	224	219	NaN	NaN	194	213	196
VA	Virginia	40	103	153	231	344	525	739	971	1051	1537	1632	2152	2386	2624	2818	2686	2791	2685	2717	2704	2683
WA	Washington	486	636	876	1076	1229	1338	1519	1587	1689	1774	1820	1964	2147	2065	2146	2121	2077	2074	2167	2197	2335
WV	West Virginia	1	9	24	27	61	79	133	170	189	246	285	345	423	458	500	456	494	505	501	479	496
WI	Wisconsin	16	26	41	78	92	169	240	284	360	512	662	835	994	1091	1238	1411	1378	1443	1616	1635	1710
WY	Wyoming	16	26	32	34	56	58	52	68	78	92	106	114	117	155	137	184	159	157	165	NaN	192

## Sheet: Age14
ST	State\Report Year	1991	1992	1993	1994	1995	1996	1997	1998	1999	2000	2001	2002	2003	2004	2005	2006	2007	2008	2009	2010	2011
AL	Alabama	54	53	85	106	129	143	174	245	273	339	425	533	526	649	672	638	683	597	660	672	720
AK	Alaska	10	15	11	55	18	40	40	50	64	92	48	75	93	102	106	173	183	182	219	203	205
AZ	Arizona	12	26	25	35	58	56	81	94	117	156	191	253	327	393	509	555	742	714	760	797	869
AR	Arkansas	25	47	85	143	185	243	259	354	480	552	617	674	791	870	865	819	820	805	791	819	864
CA	California	845	757	785	758	785	970	1035	1140	1366	1554	1861	2352	2720	3316	3665	3916	4381	4599	5074	5080	5527
CO	Colorado	NaN	NaN	NaN	NaN	NaN	NaN	NaN	NaN	NaN	NaN	NaN	NaN	NaN	NaN	NaN	NaN	NaN	NaN	NaN	NaN	NaN
CT	Connecticut	45	60	111	168	217	317	429	580	664	784	897	989	1040	1116	1163	1049	1139	1189	1129	1141	1193
DE	Delaware	NaN	NaN	NaN	NaN	NaN	NaN	NaN	NaN	NaN	NaN	NaN	NaN	NaN	NaN	177	193	234	213	204	211	197
DC	District of Columbia	NaN	NaN	NaN	3	7	10	2	10	4	7	9	14	22	28	26	47	44	36	55	73	92
FL	Florida	346	172	147	230	199	226	345	403	518	706	875	1135	1380	1706	1888	2078	2336	2358	2292	2409	2534
GA	Georgia	44	57	126	190	298	392	578	694	965	1209	1530	1716	2106	2350	2523	2629	2632	2703	2794	2749	2735
HI	Hawaii	18	11	22	19	18	30	40	50	61	100	111	138	207	214	273	273	240	302	253	275	255
ID	Idaho	15	38	22	39	54	39	67	92	103	118	154	145	172	193	223	248	258	253	251	299	349
IL	Illinois	86	109	146	212	293	330	316	448	627	756	779	1323	1585	1931	2115	2273	2508	2544	2554	2707	2702
IN	Indiana	NaN	10	34	73	107	123	143	182	240	324	405	530	649	746	891	995	1043	1102	1279	1273	1315
IA	Iowa	NaN	NaN	NaN	NaN	NaN	1	5	8	8	10	14	39	47	53	79	83	57	8	7	6	7
KS	Kansas	38	57	82	137	163	205	319	373	437	522	600	662	720	703	759	711	685	696	740	746	661
KY	Kentucky	27	30	37	62	88	134	230	340	470	688	850	929	1038	1214	1349	1458	1471	1526	1586	1503	1461
LA	Louisiana	164	136	205	318	382	430	511	559	625	720	772	902	998	1020	1002	970	1021	1007	970	968	977
ME	Maine	22	26	42	72	89	99	123	128	208	263	329	364	421	452	472	491	515	534	538	524	557
MD	Maryland	65	96	95	137	204	247	348	422	584	650	750	937	1037	1232	1352	1371	1418	1458	1433	1449	1502
MA	Massachusetts	122	75	77	85	83	84	89	91	94	93	290	360	606	746	782	970	1145	1276	1326	1470	1572
MI	Michigan	NaN	NaN	NaN	NaN	NaN	NaN	NaN	NaN	NaN	NaN	NaN	123	804	1306	1613	1766	1913	1935	1936	1958	1978
MN	Minnesota	41	88	141	233	270	368	437	573	675	710	874	979	1116	1302	1393	1418	1453	1640	1602	1710	1739
MS	Mississippi	NaN	NaN	NaN	NaN	NaN	NaN	NaN	NaN	NaN	NaN	NaN	104	261	333	386	479	533	564	588	660	700
MO	Missouri	17	35	85	127	189	256	344	472	600	688	817	997	1159	1318	1399	1569	1584	1786	1829	1897	1933
MT	Montana	22	22	41	47	64	68	73	80	108	125	135	175	172	182	206	206	197	201	209	198	197
NE	Nebraska	43	66	62	80	95	117	145	153	163	207	260	311	373	446	420	490	488	507	511	527	532
NV	Nevada	19	50	46	29	34	45	66	69	100	117	143	171	217	243	258	253	289	305	287	301	306
NH	New Hampshire	43	57	84	104	158	198	226	244	295	380	409	460	474	487	491	494	444	488	514	493	503
NJ	New Jersey	39	53	53	52	42	53	64	110	288	508	877	1061	1527	1801	2126	2292	2629	2587	2990	3291	3448
NM	New Mexico	13	20	43	62	56	59	100	107	155	167	203	246	288	318	337	345	332	311	291	338	330
NY	New York	293	251	365	545	757	966	1193	1453	1735	2090	2439	2857	3277	3645	3994	4299	4467	4630	4958	5037	5175
NC	North Carolina	145	191	247	393	446	638	754	918	1118	1118	1642	1960	2259	2576	2748	2828	2975	3007	2971	3202	3238
ND	North Dakota	2	9	12	12	21	26	30	43	52	60	73	89	103	109	129	135	155	147	166	182	188
OH	Ohio	NaN	146	189	215	226	225	289	354	407	534	747	1067	1307	1585	1923	2132	2391	2517	2753	2879	3050
OK	Oklahoma	20	17	37	48	61	84	99	166	195	292	365	451	544	644	703	879	920	952	996	1135	1237
OR	Oregon	68	78	115	150	182	200	248	326	371	450	478	613	666	764	784	831	827	889	872	988	981
PA	Pennsylvania	3	9	13	17	25	56	76	106	117	199	283	414	610	839	1046	1338	1610	1760	2089	2181	2503
RI	Rhode Island	21	23	27	47	77	81	104	146	163	238	272	333	426	433	489	491	452	438	425	391	375
SC	South Carolina	6	8	26	48	60	107	163	174	246	281	408	478	554	665	770	779	925	893	894	1001	1030
SD	South Dakota	3	4	9	10	10	29	24	28	36	62	61	90	132	142	143	140	131	147	156	160	167
TN	Tennessee	167	218	293	413	503	719	771	797	851	855	880	1029	1058	1174	1195	1171	1166	1248	1168	1155	1290
TX	Texas	830	952	1181	1403	1621	2058	2289	2637	2993	3185	3547	3945	4310	4798	5128	5256	5463	5527	5350	4975	4717
UT	Utah	34	37	40	49	59	73	70	77	81	123	140	153	200	269	316	309	351	395	400	451	467
VT	Vermont	11	9	12	34	43	59	58	77	94	122	126	150	178	163	212	236	NaN	NaN	193	200	206
VA	Virginia	35	76	133	207	308	450	608	814	1042	1394	1640	1890	2273	2632	2689	2841	2770	2802	2714	2749	2762
WA	Washington	400	533	747	1005	1163	1240	1378	1521	1581	1717	1779	1866	2016	2194	2182	2146	2154	2135	2093	2204	2245
WV	West Virginia	1	9	12	40	37	71	104	157	189	207	270	324	381	465	488	504	467	502	513	506	505
WI	Wisconsin	19	30	43	75	108	166	211	249	338	409	612	726	939	1120	1207	1291	1512	1457	1575	1686	1688
WY	Wyoming	21	21	28	40	36	55	66	56	72	72	98	114	126	122	157	144	172	161	146	NaN	182

[truncated: 3 more sheets: Age15, Age16, Age17]
